# Supplementary material
Source: PubMed Central journal article supplement (PMC3769934)
Supplement: mmc1.pdf [file mmc1.pdf]

The American Journal of Human Genetics, Volume 93

## **Supplemental Data**

### **DrGaP: A Powerful Tool for Identifying Driver Genes and Pathways in Cancer Sequencing Studies**

Xing Hua, Haiming Xu, Yaning Yang, Jun Zhu, Pengyuan Liu, and Yan Lu

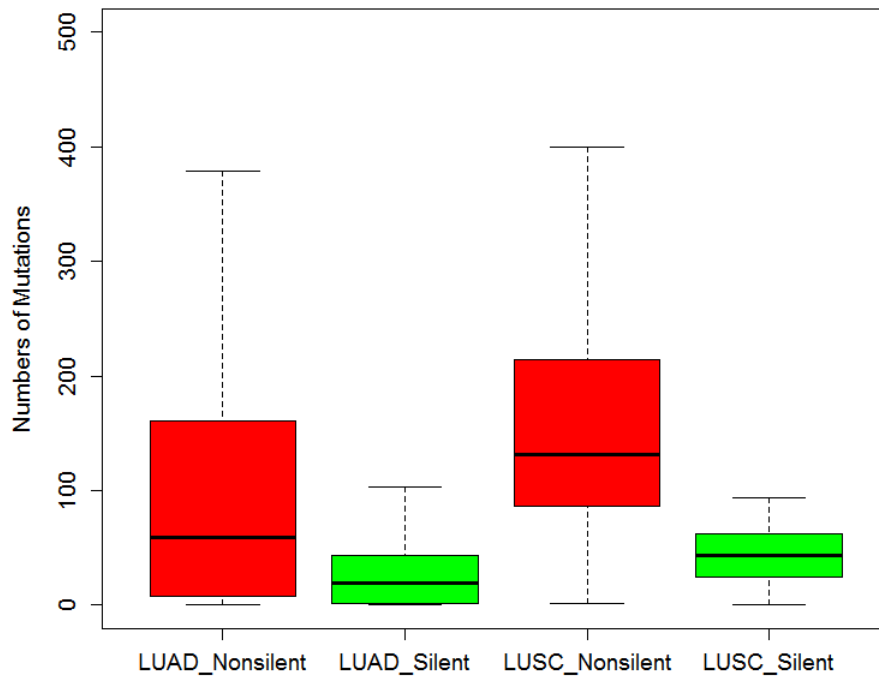

**Figure S1. Numbers of somatic mutations in CDS per lung cancer exome.** As of Dec 2011, 119 lung adenocarcinoma (LUAD) and 127 lung squamous cell carcinoma (LUSC) exomes in the format of BAM files from TCGA were downloaded and analyzed by our in-house analysis pipeline for cancer genome sequencing data (Liu et al. *Carcinogenesis*. 33(7):1270-6, 2012). Briefly, after alignment, PCR duplicates will be removed by Picard (<http://picard.sourceforge.net>). SNVs will be called by both SomaticSniper (Larson et al. *Bioinformatics* 28, 311-317, 2012) and VarScan (Koboldt et al. *Genome Res* 22, 568-576, 2012). We defined high-quality SNVs as those detected by both SomaticSniper with Somatic Score > 40 and mapping quality > 40 and VarScan with somatic p value < 0.05. To minimize false positives, we adopted a stringent set of criteria: 1) minimum coverage of a specific position as 8X in normal and 8X in tumor, 2) minimum reads of variant allele as 3 and minimum proportion of variant allele as 15% in tumor, and 3) minimum number of 1 reads supporting the variant allele per strand. For small insertion and deletions (indels), we further removed them with any support reads from its matched normal control. Such filtering criteria ensure a high validation rate for somatic mutations at about 90%. The lists of SNVs/indels were finally annotated by using ANNOVAR (Wang *Nucleic Acids Research* 38, e164, 2010). We first filtered SNVs/indels by various public databases including dbSNP, 1000 genomes and HapMap exome Project. After filtering, these novel SNVs/indels were subject to functional annotation using the NCBI refseq gene database (<http://www.ncbi.nlm.nih.gov/gene>). After gene annotation, somatic mutations in a gene were counted and classified into silent, missense, nonsense, splicing mutations, in-frame and out-of-frame indels; each type of mutations except indels are further classified into nine of nucleotide types based on the base of interest and its flanking bases and location of CpG islands.

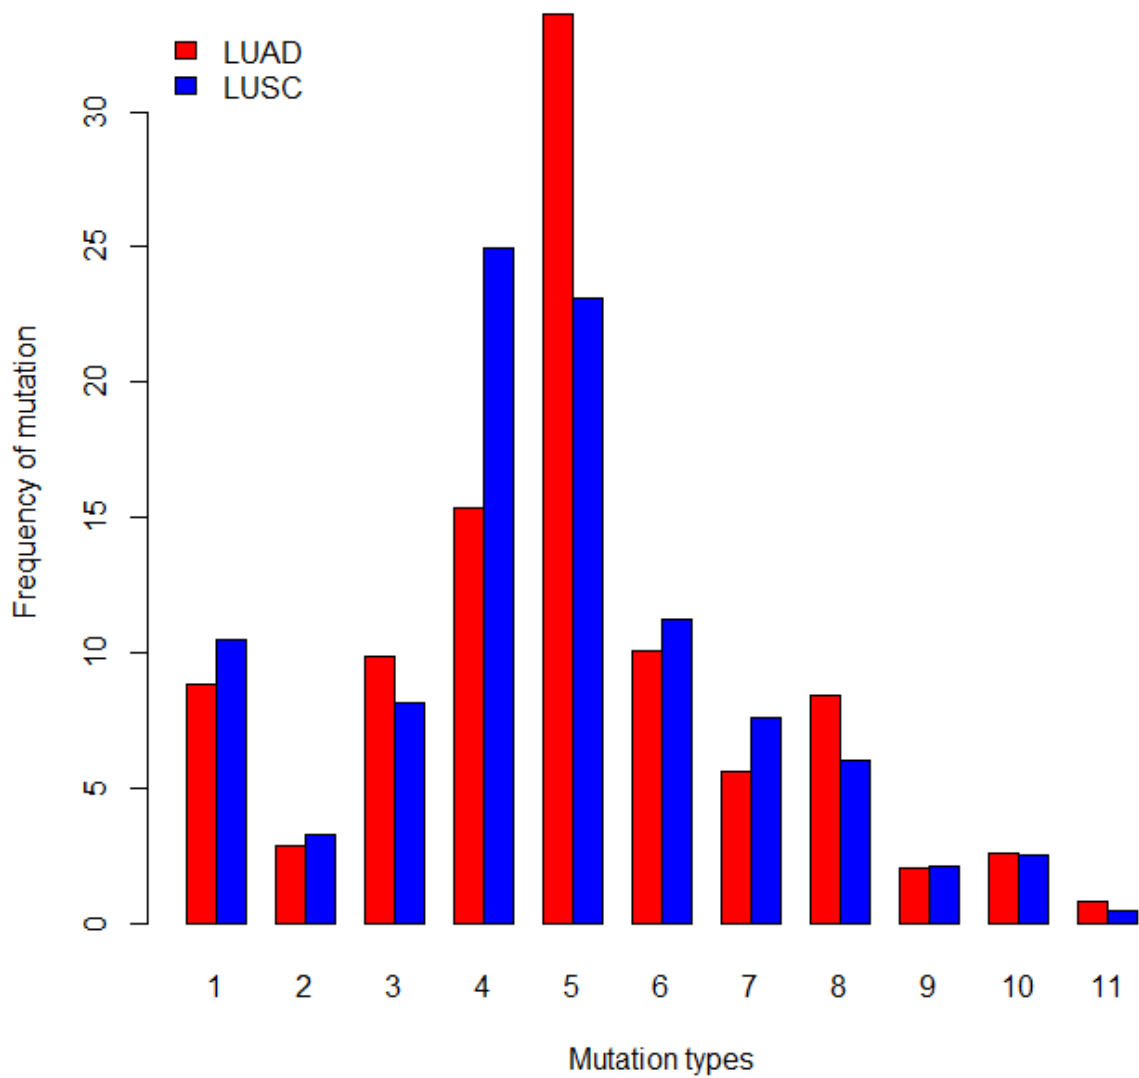

**Figure S2. Somatic single-nucleotide mutation trends and patterns in lung cancer.** The numbers 1 to 11 represent different types of mutation in Table S1: i.e., A/T→G/C, A/T→C/G, A/T→T/A, C/G→T/A at non CpG, C/G→A/T at non CpG, C/G→G/C at non CpG, C/G→T/A at CpG, C/G→A/T at CpG, C/G→G/C at CpG, in-frame indels, and out-of-frame indels.

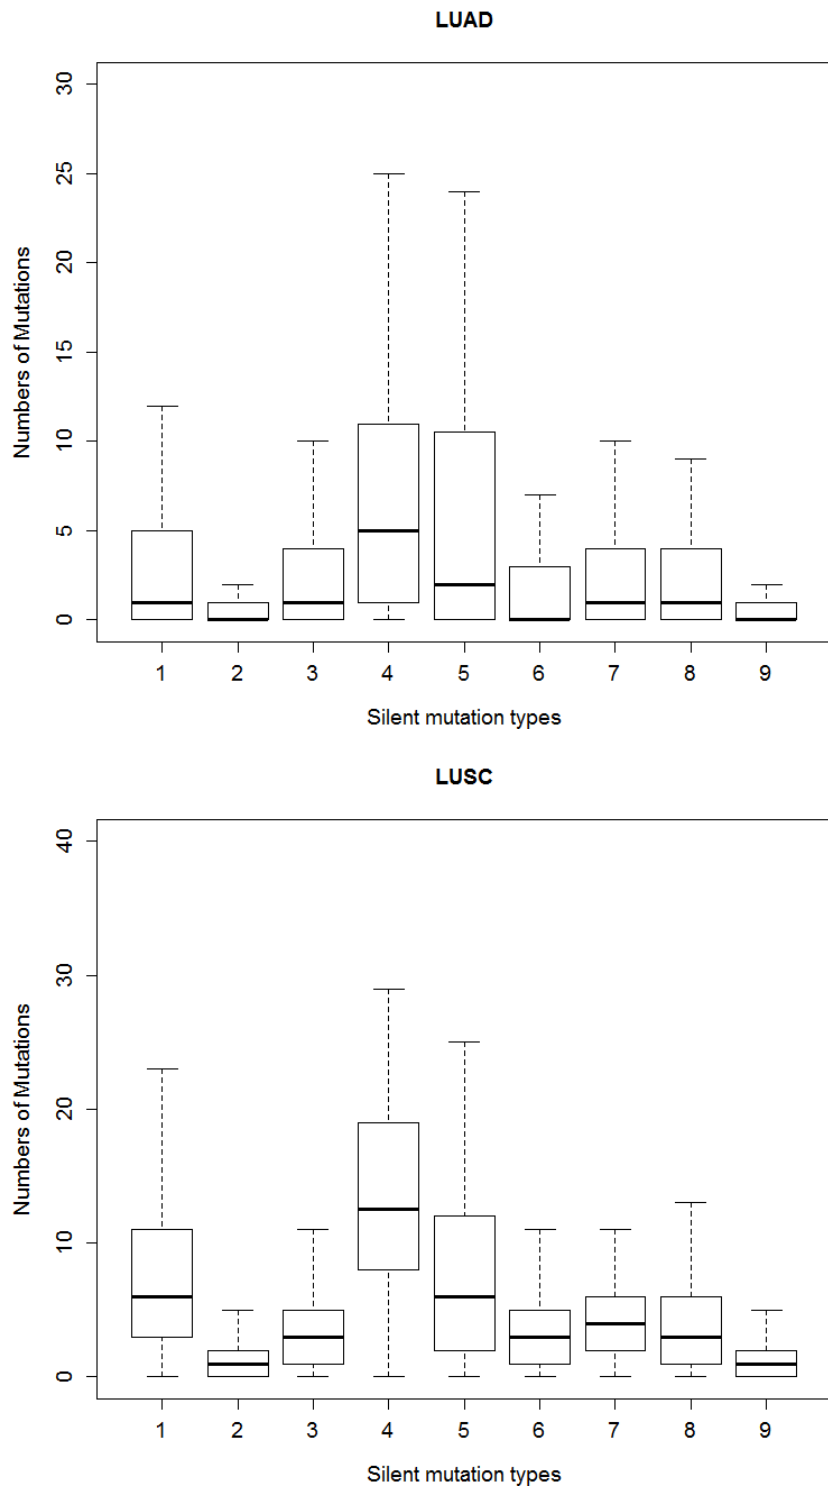

**Figure S3. Numbers of different types of silent mutations per lung cancer exome.** The numbers 1 to 9 represent different types of mutation except indels in Table S1.

### Distribution of Background Mutation Rate

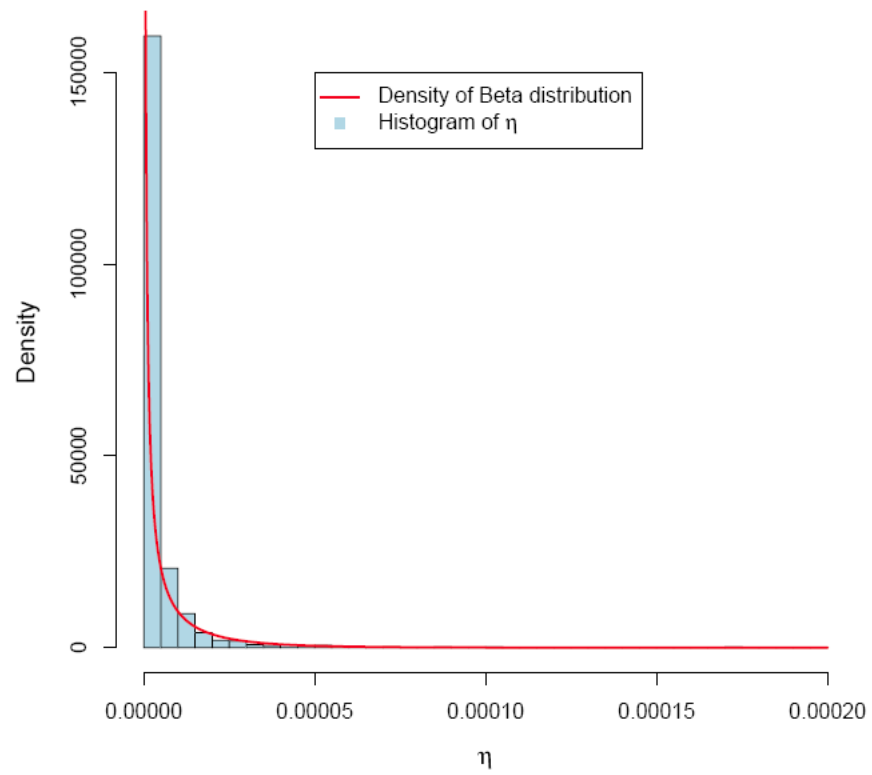

**Figure S4. Beta prior of background mutation rates.** Silent mutations identified in LUAD and LUSC were used for estimating background mutation rates.

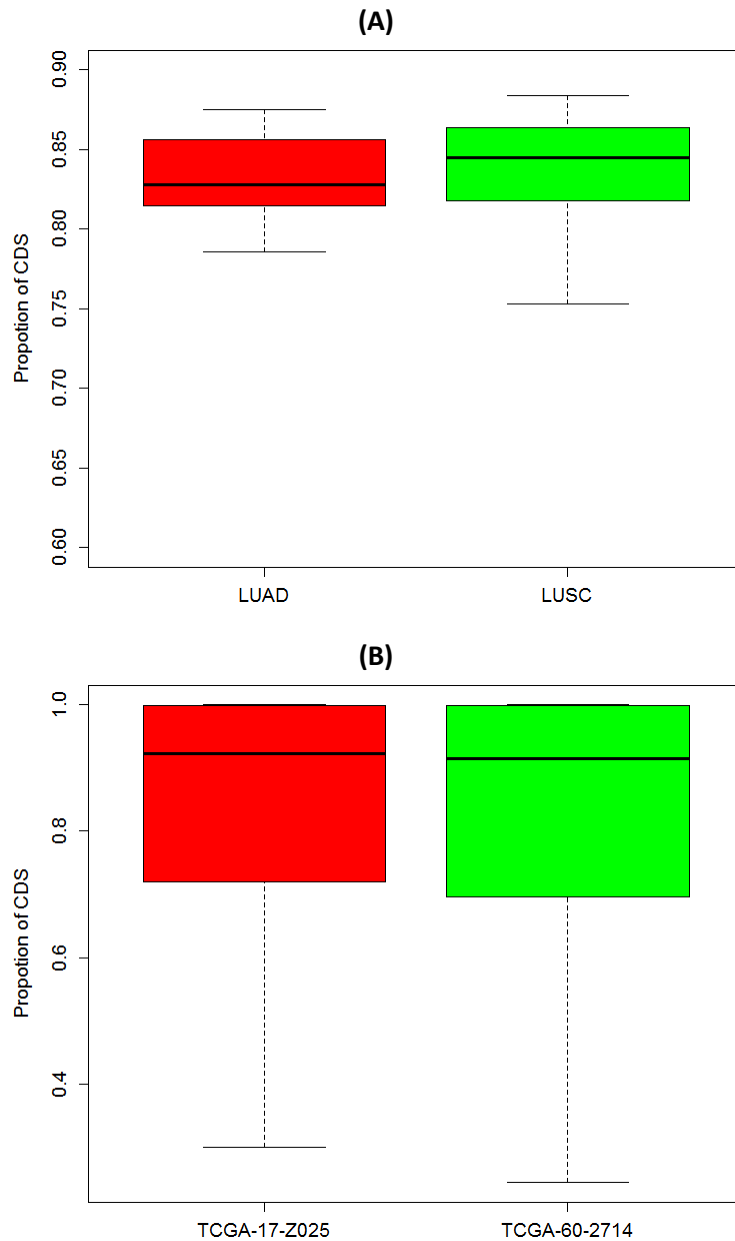

**Figure S5. Proportion of CDS with  $\geq 8x$  in both tumor and normal DNAs.** (A) The proportion of CDS was plotted against all LUAD and LUSC samples. (B) The proportion of CDS was plotted against all of the genes within the same samples; one representative sample from LUAD and one from LUSC were presented. The software for estimating sequence coverage in tumor and normal matched samples, pairdoc is available at <http://code.google.com/p/pairdoc/>.

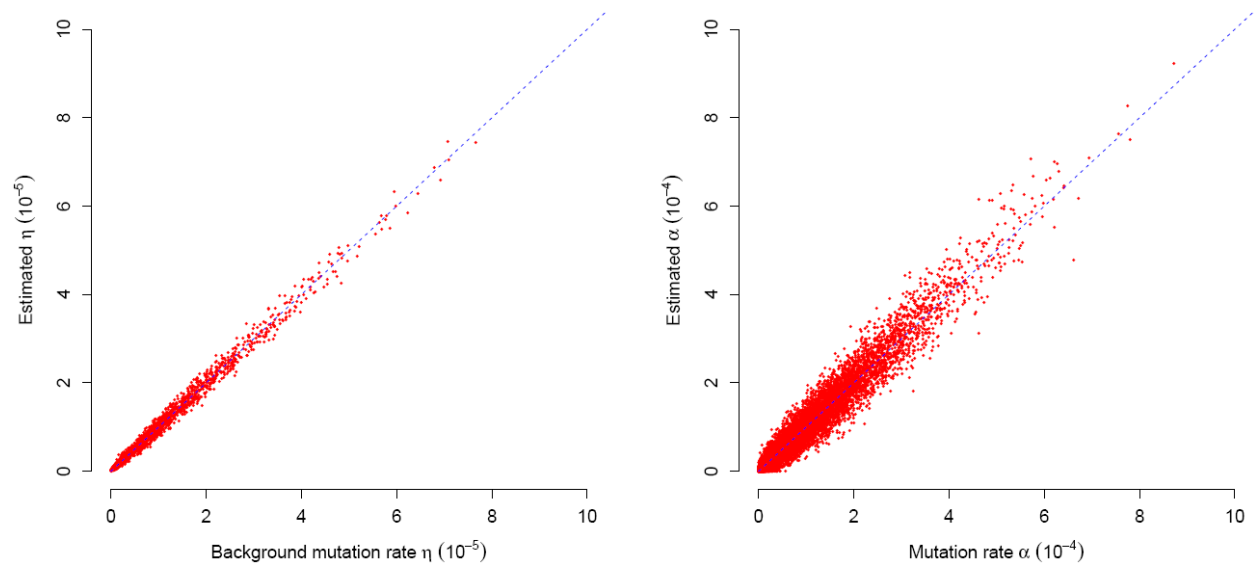

**Figure S6. Parameter estimation of  $\eta$  and  $\alpha$  when at least one type of driver mutations occur in tumor samples.**

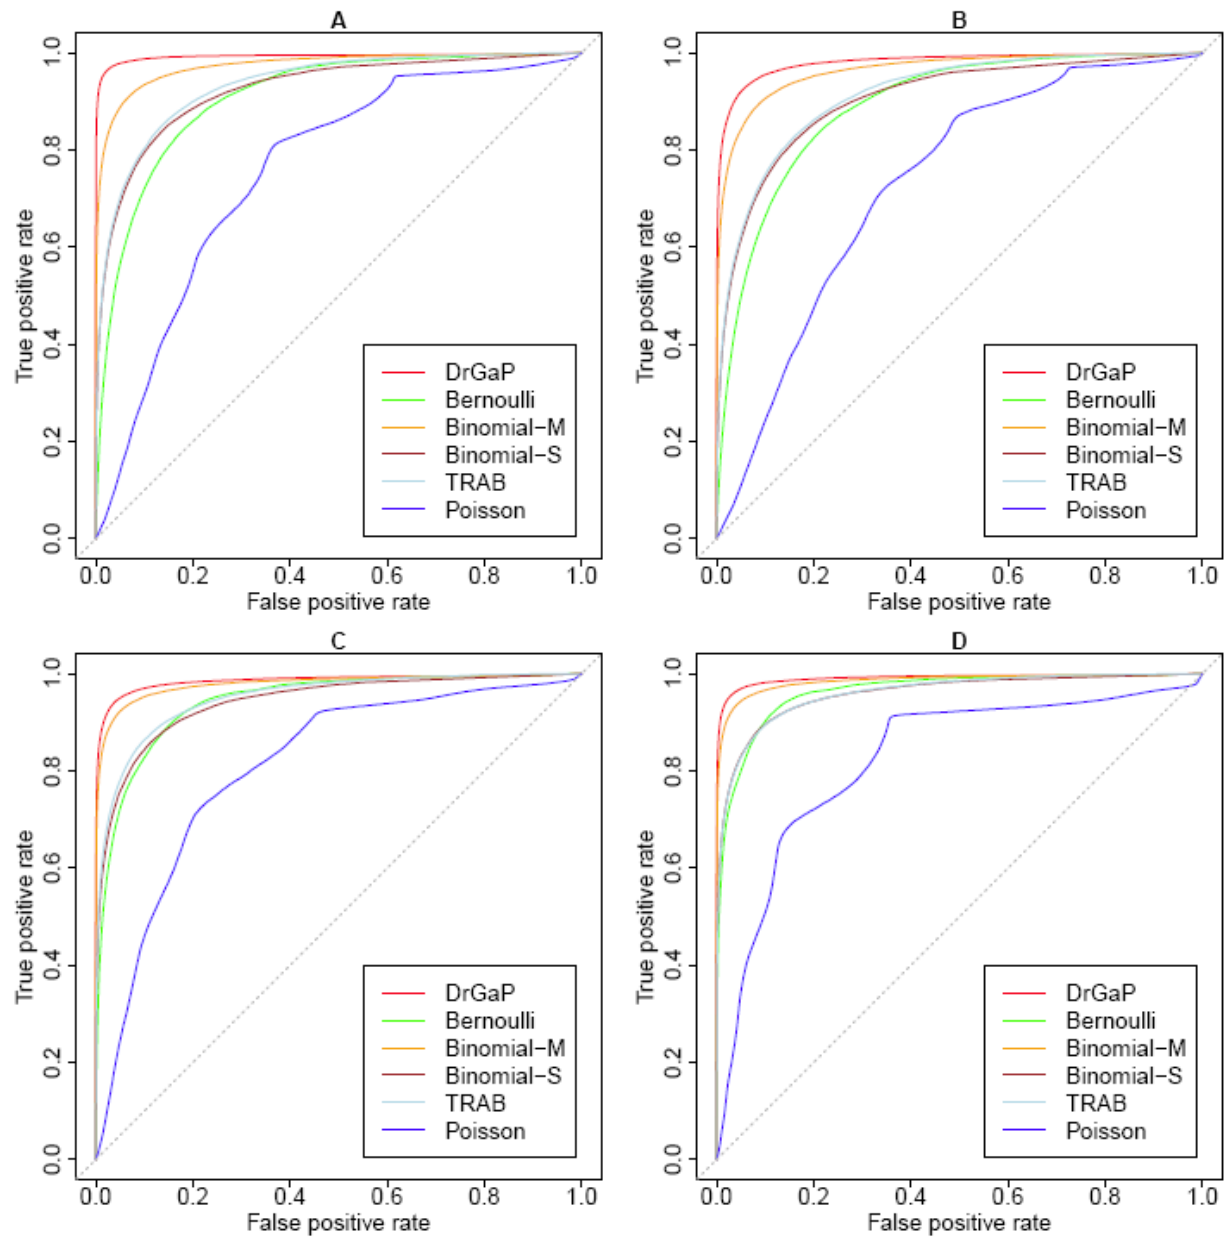

**Figure S7. ROC plots of sensitivity and specificity of six statistical methods in TCGA-simulated data. (A) LUAD, (B) LUSC, (C) Non-hypermethylated CRC, and (D) HGS-OvCa.**



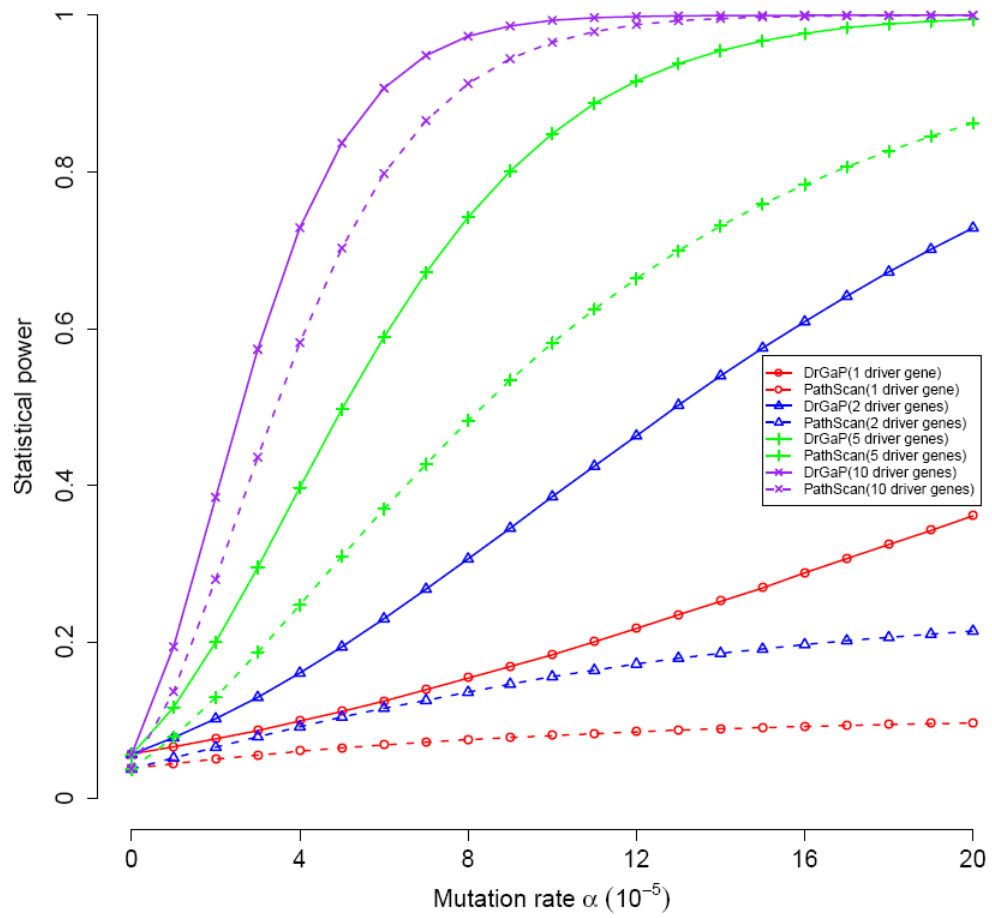

**Figure S8. Comparison of DrGaP with PathScan for identifying driver pathways.** Twenty genes in a pathway were simulated. 1, 2, 5 and 10 genes were simulated to be driver genes in the pathway.

**Table S1** Mutation types

---

*A/T→G/C*

*A/T→C/G*

*A/T→T/A*

*C/G→T/A* at non CpG

*C/G→A/T* at non CpG

*C/G→G/C* at non CpG

*C/G→T/A* at CpG

*C/G→A/T* at CpG

*C/G→G/C* at CpG

In-frame indels

Out-of-frame indels

---

\*Except indel, all mutation types are further classified into silent, missense, nonsense and splicing mutations.

**Table S2** CDS coverage in both tumor and its matched normal DNAs from LUAD samples\*

| <b>LUAD_samples</b> | <b>Total_bases</b> | <b>Average</b> | <b>Median</b> | <b>&gt;=1</b> | <b>&gt;=5</b> | <b>&gt;=8</b> | <b>&gt;=10</b> | <b>&gt;=15</b> | <b>&gt;=20</b> |
|---------------------|--------------------|----------------|---------------|---------------|---------------|---------------|----------------|----------------|----------------|
| TCGA-05-4244        | 8,550,199,268      | 241            | 100           | 0.91          | 0.88          | 0.87          | 0.86           | 0.83           | 0.81           |
| TCGA-05-4249        | 8,141,453,137      | 230            | 95            | 0.91          | 0.88          | 0.87          | 0.86           | 0.83           | 0.81           |
| TCGA-05-4250        | 8,857,970,361      | 250            | 100           | 0.91          | 0.88          | 0.86          | 0.85           | 0.83           | 0.80           |
| TCGA-05-4382        | 6,248,490,266      | 176            | 74            | 0.91          | 0.87          | 0.85          | 0.84           | 0.81           | 0.78           |
| TCGA-05-4389        | 6,504,954,943      | 183            | 77            | 0.91          | 0.87          | 0.86          | 0.84           | 0.81           | 0.79           |
| TCGA-05-4395        | 6,412,601,231      | 181            | 75            | 0.91          | 0.87          | 0.85          | 0.84           | 0.81           | 0.78           |
| TCGA-05-4397        | 6,474,290,614      | 183            | 76            | 0.91          | 0.87          | 0.85          | 0.84           | 0.81           | 0.79           |
| TCGA-05-4398        | 6,976,210,852      | 197            | 83            | 0.91          | 0.88          | 0.86          | 0.85           | 0.82           | 0.80           |
| TCGA-05-4402        | 6,952,905,850      | 196            | 83            | 0.91          | 0.88          | 0.86          | 0.85           | 0.82           | 0.80           |
| TCGA-05-4403        | 6,695,121,803      | 189            | 81            | 0.91          | 0.88          | 0.86          | 0.85           | 0.82           | 0.79           |
| TCGA-05-4418        | 6,885,546,507      | 194            | 82            | 0.91          | 0.88          | 0.86          | 0.85           | 0.82           | 0.79           |
| TCGA-05-4420        | 6,633,581,234      | 187            | 78            | 0.91          | 0.88          | 0.86          | 0.84           | 0.82           | 0.79           |
| TCGA-05-4422        | 6,947,237,050      | 196            | 82            | 0.91          | 0.88          | 0.86          | 0.85           | 0.82           | 0.79           |
| TCGA-05-4426        | 6,628,626,221      | 187            | 79            | 0.91          | 0.88          | 0.86          | 0.85           | 0.82           | 0.79           |
| TCGA-05-4430        | 6,781,440,027      | 191            | 81            | 0.91          | 0.87          | 0.86          | 0.85           | 0.82           | 0.80           |
| TCGA-05-4432        | 6,176,128,303      | 174            | 74            | 0.91          | 0.87          | 0.85          | 0.84           | 0.81           | 0.78           |
| TCGA-05-4434        | 6,639,013,847      | 187            | 79            | 0.91          | 0.87          | 0.85          | 0.84           | 0.82           | 0.79           |
| TCGA-17-Z000        | 5,024,987,113      | 142            | 54            | 0.95          | 0.86          | 0.83          | 0.81           | 0.77           | 0.73           |
| TCGA-17-Z001        | 4,990,575,011      | 141            | 53            | 0.94          | 0.86          | 0.82          | 0.80           | 0.76           | 0.72           |
| TCGA-17-Z002        | 5,286,576,569      | 149            | 53            | 0.94          | 0.85          | 0.82          | 0.80           | 0.76           | 0.72           |
| TCGA-17-Z003        | 4,890,993,570      | 138            | 52            | 0.94          | 0.85          | 0.82          | 0.80           | 0.75           | 0.71           |
| TCGA-17-Z004        | 4,253,794,618      | 120            | 44            | 0.93          | 0.84          | 0.80          | 0.78           | 0.72           | 0.67           |
| TCGA-17-Z005        | 4,955,294,618      | 140            | 52            | 0.94          | 0.85          | 0.82          | 0.80           | 0.76           | 0.72           |
| TCGA-17-Z007        | 6,320,802,262      | 178            | 61            | 0.94          | 0.85          | 0.82          | 0.80           | 0.76           | 0.72           |
| TCGA-17-Z008        | 4,256,828,926      | 120            | 44            | 0.93          | 0.84          | 0.81          | 0.79           | 0.73           | 0.68           |
| TCGA-17-Z009        | 5,000,269,099      | 141            | 51            | 0.93          | 0.85          | 0.81          | 0.79           | 0.74           | 0.70           |
| TCGA-17-Z010        | 4,762,475,869      | 134            | 50            | 0.94          | 0.85          | 0.82          | 0.80           | 0.75           | 0.71           |
| TCGA-17-Z011        | 4,794,352,581      | 135            | 49            | 0.94          | 0.85          | 0.82          | 0.80           | 0.75           | 0.71           |
| TCGA-17-Z012        | 4,468,995,068      | 126            | 47            | 0.94          | 0.85          | 0.81          | 0.79           | 0.75           | 0.70           |
| TCGA-17-Z013        | 5,098,751,396      | 144            | 53            | 0.93          | 0.85          | 0.81          | 0.79           | 0.75           | 0.71           |
| TCGA-17-Z014        | 5,019,432,334      | 142            | 49            | 0.93          | 0.84          | 0.81          | 0.79           | 0.74           | 0.70           |
| TCGA-17-Z015        | 5,031,885,599      | 142            | 49            | 0.93          | 0.84          | 0.81          | 0.79           | 0.74           | 0.70           |
| TCGA-17-Z016        | 6,118,743,175      | 173            | 60            | 0.94          | 0.86          | 0.82          | 0.80           | 0.76           | 0.71           |
| TCGA-17-Z017        | 4,636,259,660      | 131            | 48            | 0.93          | 0.84          | 0.80          | 0.78           | 0.73           | 0.68           |
| TCGA-17-Z018        | 4,941,386,804      | 139            | 53            | 0.94          | 0.85          | 0.82          | 0.80           | 0.75           | 0.71           |
| TCGA-17-Z019        | 5,266,514,641      | 149            | 53            | 0.94          | 0.85          | 0.82          | 0.80           | 0.75           | 0.71           |
| TCGA-17-Z020        | 6,159,700,966      | 174            | 66            | 0.95          | 0.87          | 0.83          | 0.81           | 0.78           | 0.74           |
| TCGA-17-Z021        | 6,301,328,765      | 178            | 64            | 0.94          | 0.86          | 0.83          | 0.81           | 0.77           | 0.73           |
| TCGA-17-Z022        | 6,869,694,781      | 194            | 66            | 0.95          | 0.86          | 0.82          | 0.80           | 0.75           | 0.70           |
| TCGA-17-Z023        | 5,063,382,776      | 143            | 52            | 0.94          | 0.86          | 0.82          | 0.80           | 0.76           | 0.71           |
| TCGA-17-Z025        | 4,690,704,370      | 132            | 47            | 0.93          | 0.84          | 0.80          | 0.78           | 0.73           | 0.68           |

|              |                |     |     |      |      |      |      |      |      |
|--------------|----------------|-----|-----|------|------|------|------|------|------|
| TCGA-17-Z026 | 5,002,245,683  | 141 | 53  | 0.94 | 0.85 | 0.82 | 0.80 | 0.75 | 0.71 |
| TCGA-17-Z027 | 5,124,355,996  | 145 | 50  | 0.94 | 0.85 | 0.81 | 0.79 | 0.75 | 0.70 |
| TCGA-17-Z028 | 4,893,270,031  | 138 | 51  | 0.94 | 0.85 | 0.81 | 0.79 | 0.75 | 0.71 |
| TCGA-17-Z030 | 5,356,783,935  | 151 | 55  | 0.94 | 0.86 | 0.82 | 0.80 | 0.76 | 0.72 |
| TCGA-17-Z031 | 6,148,899,918  | 173 | 61  | 0.94 | 0.86 | 0.83 | 0.81 | 0.77 | 0.73 |
| TCGA-17-Z032 | 8,100,544,291  | 228 | 77  | 0.95 | 0.88 | 0.85 | 0.83 | 0.79 | 0.76 |
| TCGA-17-Z033 | 5,028,644,814  | 142 | 53  | 0.94 | 0.85 | 0.82 | 0.80 | 0.76 | 0.71 |
| TCGA-17-Z035 | 4,407,434,150  | 124 | 44  | 0.93 | 0.84 | 0.81 | 0.78 | 0.74 | 0.69 |
| TCGA-17-Z036 | 4,222,579,044  | 119 | 39  | 0.93 | 0.83 | 0.79 | 0.76 | 0.70 | 0.65 |
| TCGA-17-Z037 | 4,731,735,024  | 133 | 50  | 0.94 | 0.86 | 0.82 | 0.80 | 0.76 | 0.72 |
| TCGA-17-Z039 | 5,092,766,204  | 144 | 52  | 0.94 | 0.86 | 0.82 | 0.80 | 0.76 | 0.72 |
| TCGA-17-Z040 | 7,445,428,825  | 210 | 76  | 0.95 | 0.88 | 0.84 | 0.82 | 0.78 | 0.75 |
| TCGA-17-Z041 | 7,368,632,488  | 208 | 70  | 0.95 | 0.86 | 0.83 | 0.81 | 0.77 | 0.74 |
| TCGA-17-Z042 | 4,332,427,729  | 122 | 46  | 0.94 | 0.85 | 0.81 | 0.79 | 0.74 | 0.69 |
| TCGA-17-Z043 | 5,138,559,822  | 145 | 54  | 0.94 | 0.86 | 0.83 | 0.81 | 0.76 | 0.71 |
| TCGA-17-Z044 | 5,138,266,971  | 145 | 51  | 0.93 | 0.84 | 0.81 | 0.79 | 0.74 | 0.70 |
| TCGA-17-Z045 | 4,373,263,065  | 123 | 46  | 0.94 | 0.84 | 0.81 | 0.79 | 0.74 | 0.69 |
| TCGA-17-Z046 | 11,412,066,473 | 322 | 113 | 0.90 | 0.86 | 0.84 | 0.83 | 0.80 | 0.78 |
| TCGA-17-Z047 | 9,415,360,551  | 266 | 89  | 0.90 | 0.85 | 0.82 | 0.81 | 0.78 | 0.75 |
| TCGA-17-Z048 | 9,934,284,549  | 280 | 99  | 0.90 | 0.86 | 0.83 | 0.82 | 0.79 | 0.77 |
| TCGA-17-Z049 | 11,572,097,978 | 326 | 120 | 0.90 | 0.87 | 0.85 | 0.84 | 0.81 | 0.79 |
| TCGA-17-Z050 | 10,392,925,407 | 293 | 97  | 0.90 | 0.85 | 0.83 | 0.82 | 0.79 | 0.77 |
| TCGA-17-Z051 | 10,762,406,491 | 304 | 104 | 0.90 | 0.86 | 0.84 | 0.82 | 0.80 | 0.77 |
| TCGA-17-Z052 | 8,326,221,706  | 235 | 74  | 0.90 | 0.85 | 0.82 | 0.81 | 0.77 | 0.73 |
| TCGA-17-Z053 | 10,908,464,344 | 308 | 100 | 0.90 | 0.85 | 0.83 | 0.82 | 0.79 | 0.76 |
| TCGA-17-Z054 | 10,255,724,852 | 289 | 96  | 0.90 | 0.85 | 0.82 | 0.81 | 0.78 | 0.75 |
| TCGA-17-Z056 | 10,343,720,841 | 292 | 99  | 0.90 | 0.85 | 0.83 | 0.82 | 0.79 | 0.76 |
| TCGA-17-Z058 | 10,277,990,763 | 290 | 97  | 0.90 | 0.85 | 0.83 | 0.82 | 0.79 | 0.76 |
| TCGA-17-Z059 | 10,345,560,251 | 292 | 91  | 0.89 | 0.85 | 0.82 | 0.81 | 0.78 | 0.75 |
| TCGA-17-Z060 | 11,687,955,784 | 330 | 116 | 0.90 | 0.86 | 0.84 | 0.83 | 0.80 | 0.78 |
| TCGA-17-Z061 | 8,617,309,330  | 243 | 78  | 0.89 | 0.83 | 0.81 | 0.79 | 0.76 | 0.73 |
| TCGA-17-Z062 | 9,428,428,654  | 266 | 92  | 0.90 | 0.85 | 0.83 | 0.82 | 0.79 | 0.76 |
| TCGA-35-3615 | 11,560,329,590 | 326 | 103 | 0.91 | 0.85 | 0.83 | 0.82 | 0.79 | 0.77 |
| TCGA-35-4122 | 7,706,957,527  | 217 | 92  | 0.91 | 0.88 | 0.87 | 0.86 | 0.83 | 0.81 |
| TCGA-35-4123 | 8,448,084,395  | 238 | 100 | 0.91 | 0.89 | 0.87 | 0.87 | 0.84 | 0.82 |
| TCGA-38-4628 | 7,097,414,068  | 200 | 83  | 0.91 | 0.87 | 0.86 | 0.85 | 0.82 | 0.80 |
| TCGA-38-4629 | 7,093,186,083  | 200 | 86  | 0.91 | 0.88 | 0.86 | 0.85 | 0.83 | 0.80 |
| TCGA-38-4630 | 6,628,555,257  | 187 | 76  | 0.91 | 0.87 | 0.85 | 0.84 | 0.81 | 0.79 |
| TCGA-44-2655 | 12,124,112,677 | 342 | 112 | 0.90 | 0.84 | 0.82 | 0.81 | 0.79 | 0.77 |
| TCGA-44-2656 | 11,612,984,586 | 328 | 99  | 0.90 | 0.83 | 0.81 | 0.80 | 0.77 | 0.75 |
| TCGA-44-2657 | 8,731,442,439  | 246 | 104 | 0.91 | 0.89 | 0.87 | 0.86 | 0.84 | 0.82 |
| TCGA-44-2659 | 12,874,000,185 | 363 | 103 | 0.88 | 0.83 | 0.81 | 0.79 | 0.77 | 0.74 |
| TCGA-44-2661 | 8,709,735,208  | 246 | 101 | 0.91 | 0.89 | 0.87 | 0.86 | 0.84 | 0.82 |
| TCGA-44-2662 | 11,054,468,462 | 312 | 94  | 0.90 | 0.84 | 0.81 | 0.80 | 0.77 | 0.75 |

|              |                |     |     |      |      |      |      |      |      |
|--------------|----------------|-----|-----|------|------|------|------|------|------|
| TCGA-44-2665 | 12,568,984,832 | 354 | 118 | 0.90 | 0.84 | 0.82 | 0.81 | 0.79 | 0.77 |
| TCGA-44-2666 | 11,694,650,525 | 330 | 107 | 0.91 | 0.85 | 0.83 | 0.82 | 0.79 | 0.77 |
| TCGA-44-2668 | 12,467,883,648 | 352 | 119 | 0.90 | 0.85 | 0.83 | 0.82 | 0.80 | 0.78 |
| TCGA-44-3396 | 7,196,119,294  | 203 | 87  | 0.91 | 0.88 | 0.86 | 0.85 | 0.83 | 0.81 |
| TCGA-44-3398 | 8,532,105,328  | 241 | 101 | 0.91 | 0.89 | 0.87 | 0.86 | 0.84 | 0.82 |
| TCGA-44-3918 | 8,370,998,041  | 236 | 95  | 0.91 | 0.88 | 0.87 | 0.86 | 0.84 | 0.81 |
| TCGA-44-3919 | 8,511,443,441  | 240 | 99  | 0.91 | 0.89 | 0.87 | 0.86 | 0.84 | 0.82 |
| TCGA-44-4112 | 8,280,325,124  | 234 | 94  | 0.91 | 0.88 | 0.87 | 0.86 | 0.83 | 0.81 |
| TCGA-49-4486 | 6,517,437,373  | 184 | 78  | 0.91 | 0.87 | 0.86 | 0.84 | 0.82 | 0.79 |
| TCGA-49-4494 | 6,803,747,371  | 192 | 82  | 0.91 | 0.88 | 0.86 | 0.85 | 0.82 | 0.80 |
| TCGA-49-4501 | 6,734,942,016  | 190 | 80  | 0.91 | 0.87 | 0.86 | 0.84 | 0.82 | 0.79 |
| TCGA-49-4505 | 7,132,867,043  | 201 | 85  | 0.91 | 0.87 | 0.86 | 0.85 | 0.82 | 0.80 |
| TCGA-49-4506 | 5,971,246,966  | 168 | 73  | 0.91 | 0.87 | 0.85 | 0.84 | 0.81 | 0.78 |
| TCGA-49-4507 | 6,995,098,538  | 197 | 83  | 0.91 | 0.88 | 0.86 | 0.85 | 0.82 | 0.80 |
| TCGA-49-4510 | 6,669,396,239  | 188 | 78  | 0.91 | 0.87 | 0.85 | 0.84 | 0.81 | 0.78 |
| TCGA-55-1592 | 10,723,489,826 | 302 | 101 | 0.90 | 0.84 | 0.82 | 0.80 | 0.78 | 0.75 |
| TCGA-55-1594 | 12,620,553,666 | 356 | 101 | 0.89 | 0.83 | 0.81 | 0.80 | 0.77 | 0.74 |
| TCGA-55-1596 | 11,811,121,232 | 333 | 103 | 0.89 | 0.83 | 0.81 | 0.80 | 0.77 | 0.75 |
| TCGA-64-1676 | 12,615,433,577 | 356 | 104 | 0.90 | 0.84 | 0.82 | 0.80 | 0.77 | 0.75 |
| TCGA-64-1677 | 12,345,468,065 | 348 | 116 | 0.90 | 0.84 | 0.82 | 0.81 | 0.79 | 0.77 |
| TCGA-64-1678 | 10,579,415,707 | 298 | 100 | 0.90 | 0.83 | 0.81 | 0.80 | 0.77 | 0.74 |
| TCGA-64-1680 | 10,560,204,019 | 298 | 94  | 0.89 | 0.83 | 0.81 | 0.79 | 0.76 | 0.73 |
| TCGA-67-3770 | 11,470,031,108 | 323 | 93  | 0.89 | 0.82 | 0.79 | 0.78 | 0.75 | 0.72 |
| TCGA-67-3771 | 12,299,443,410 | 347 | 97  | 0.89 | 0.83 | 0.80 | 0.79 | 0.76 | 0.74 |
| TCGA-67-3772 | 12,641,429,079 | 357 | 99  | 0.89 | 0.83 | 0.80 | 0.79 | 0.76 | 0.73 |
| TCGA-67-3773 | 11,989,756,211 | 338 | 103 | 0.89 | 0.83 | 0.81 | 0.80 | 0.77 | 0.75 |
| TCGA-67-3774 | 11,359,935,626 | 320 | 95  | 0.89 | 0.83 | 0.80 | 0.79 | 0.76 | 0.74 |
| TCGA-73-4659 | 6,812,839,840  | 192 | 82  | 0.91 | 0.88 | 0.86 | 0.85 | 0.82 | 0.80 |
| TCGA-73-4662 | 6,283,870,709  | 177 | 73  | 0.91 | 0.87 | 0.85 | 0.84 | 0.81 | 0.78 |
| TCGA-73-4666 | 6,362,903,523  | 179 | 75  | 0.91 | 0.87 | 0.85 | 0.84 | 0.82 | 0.79 |
| TCGA-73-4668 | 7,098,167,843  | 200 | 85  | 0.91 | 0.88 | 0.86 | 0.85 | 0.82 | 0.80 |
| TCGA-73-4670 | 6,780,832,816  | 191 | 80  | 0.91 | 0.88 | 0.86 | 0.85 | 0.82 | 0.80 |
| TCGA-73-4675 | 6,296,382,658  | 178 | 75  | 0.91 | 0.88 | 0.86 | 0.85 | 0.82 | 0.79 |
| TCGA-73-4677 | 6,991,264,920  | 197 | 83  | 0.91 | 0.87 | 0.86 | 0.84 | 0.82 | 0.79 |

**\*Note:** CDS size was estimated as 35,457,434 bp based on Ensembl annotation (GRCh37.64). CDS coverage was estimated from paired tumor and its matched normal samples from the same patient. For example, “>=8” is the proportion of CDS that has at least 8x in both tumor and its matched normal DNA samples. If a tumor has 8x and 0x at positions A and B; and its matched normal has 0x and 8x at positions A and B, the coverage at positions A and B will be 0x for the paired sample.

**Table S3** CDS coverage in both tumor and its matched normal DNAs from LUSC samples

| LUSC_samples | Total          | Average | Median | >=1  | >=5  | >=8  | >=10 | >=15 | >=20 |
|--------------|----------------|---------|--------|------|------|------|------|------|------|
| TCGA-18-3406 | 4,300,752,666  | 121     | 51     | 0.96 | 0.88 | 0.85 | 0.83 | 0.79 | 0.75 |
| TCGA-18-3407 | 4,059,509,780  | 114     | 48     | 0.96 | 0.88 | 0.84 | 0.82 | 0.78 | 0.73 |
| TCGA-18-3408 | 4,343,893,828  | 123     | 48     | 0.96 | 0.88 | 0.84 | 0.82 | 0.76 | 0.70 |
| TCGA-18-3409 | 3,817,011,933  | 108     | 46     | 0.96 | 0.88 | 0.84 | 0.82 | 0.78 | 0.74 |
| TCGA-18-3410 | 3,948,145,452  | 111     | 47     | 0.96 | 0.88 | 0.84 | 0.82 | 0.78 | 0.73 |
| TCGA-18-3411 | 4,569,248,613  | 129     | 53     | 0.96 | 0.88 | 0.85 | 0.83 | 0.79 | 0.75 |
| TCGA-18-3412 | 4,193,452,570  | 118     | 49     | 0.96 | 0.88 | 0.84 | 0.82 | 0.78 | 0.73 |
| TCGA-18-3414 | 4,125,678,520  | 116     | 48     | 0.96 | 0.88 | 0.85 | 0.83 | 0.79 | 0.74 |
| TCGA-18-3415 | 4,398,630,337  | 124     | 53     | 0.96 | 0.88 | 0.85 | 0.83 | 0.79 | 0.75 |
| TCGA-18-3416 | 4,202,188,982  | 119     | 49     | 0.96 | 0.88 | 0.84 | 0.82 | 0.77 | 0.73 |
| TCGA-18-3417 | 8,650,795,965  | 244     | 107    | 0.90 | 0.88 | 0.86 | 0.85 | 0.83 | 0.81 |
| TCGA-18-3419 | 4,629,764,688  | 131     | 55     | 0.96 | 0.89 | 0.85 | 0.84 | 0.80 | 0.76 |
| TCGA-18-3421 | 4,281,665,673  | 121     | 50     | 0.96 | 0.88 | 0.85 | 0.83 | 0.79 | 0.74 |
| TCGA-18-4083 | 10,089,511,804 | 285     | 109    | 0.91 | 0.88 | 0.87 | 0.86 | 0.84 | 0.81 |
| TCGA-18-4086 | 4,820,495,385  | 136     | 59     | 0.90 | 0.86 | 0.84 | 0.83 | 0.80 | 0.76 |
| TCGA-18-4721 | 8,487,725,365  | 239     | 108    | 0.91 | 0.88 | 0.87 | 0.86 | 0.84 | 0.82 |
| TCGA-21-1080 | 9,647,132,798  | 272     | 93     | 0.88 | 0.84 | 0.82 | 0.80 | 0.78 | 0.75 |
| TCGA-21-1081 | 12,568,030,854 | 354     | 125    | 0.92 | 0.86 | 0.84 | 0.83 | 0.81 | 0.78 |
| TCGA-21-1082 | 14,530,863,104 | 410     | 143    | 0.92 | 0.87 | 0.85 | 0.83 | 0.81 | 0.79 |
| TCGA-21-1083 | 12,681,663,741 | 358     | 118    | 0.91 | 0.85 | 0.83 | 0.82 | 0.79 | 0.77 |
| TCGA-22-1002 | 9,843,518,242  | 278     | 90     | 0.91 | 0.85 | 0.82 | 0.81 | 0.78 | 0.75 |
| TCGA-22-1005 | 10,603,037,112 | 299     | 104    | 0.91 | 0.85 | 0.83 | 0.82 | 0.79 | 0.76 |
| TCGA-22-1011 | 10,954,591,457 | 309     | 109    | 0.91 | 0.86 | 0.84 | 0.83 | 0.80 | 0.78 |
| TCGA-22-4591 | 12,534,879,137 | 354     | 118    | 0.91 | 0.88 | 0.86 | 0.85 | 0.82 | 0.78 |
| TCGA-22-4594 | 13,491,546,377 | 380     | 158    | 0.91 | 0.89 | 0.88 | 0.87 | 0.86 | 0.84 |
| TCGA-22-4595 | 12,432,029,879 | 351     | 144    | 0.91 | 0.89 | 0.88 | 0.87 | 0.85 | 0.84 |
| TCGA-22-4596 | 12,385,631,121 | 349     | 137    | 0.91 | 0.89 | 0.88 | 0.87 | 0.85 | 0.84 |
| TCGA-22-4599 | 8,894,468,819  | 251     | 109    | 0.90 | 0.88 | 0.86 | 0.85 | 0.83 | 0.82 |
| TCGA-22-4601 | 8,395,595,800  | 237     | 100    | 0.91 | 0.88 | 0.86 | 0.85 | 0.83 | 0.81 |
| TCGA-22-4604 | 15,170,631,034 | 428     | 177    | 0.92 | 0.89 | 0.88 | 0.88 | 0.86 | 0.85 |
| TCGA-22-4607 | 10,637,895,391 | 300     | 113    | 0.91 | 0.89 | 0.87 | 0.86 | 0.84 | 0.81 |
| TCGA-22-4613 | 8,811,730,283  | 249     | 108    | 0.91 | 0.88 | 0.86 | 0.86 | 0.83 | 0.82 |
| TCGA-33-4532 | 12,845,783,726 | 362     | 144    | 0.92 | 0.89 | 0.88 | 0.88 | 0.86 | 0.85 |
| TCGA-33-4538 | 8,297,405,731  | 234     | 91     | 0.91 | 0.88 | 0.87 | 0.86 | 0.83 | 0.80 |
| TCGA-33-4547 | 9,908,499,518  | 279     | 103    | 0.91 | 0.89 | 0.87 | 0.86 | 0.83 | 0.81 |
| TCGA-33-4566 | 8,603,614,058  | 243     | 108    | 0.91 | 0.88 | 0.87 | 0.86 | 0.84 | 0.82 |
| TCGA-33-4582 | 7,070,268,491  | 199     | 87     | 0.90 | 0.87 | 0.85 | 0.84 | 0.82 | 0.79 |
| TCGA-33-4583 | 7,635,042,622  | 215     | 97     | 0.91 | 0.88 | 0.87 | 0.86 | 0.84 | 0.81 |
| TCGA-33-4586 | 7,572,561,398  | 214     | 95     | 0.92 | 0.88 | 0.87 | 0.86 | 0.83 | 0.81 |
| TCGA-33-4589 | 7,981,758,118  | 225     | 102    | 0.91 | 0.88 | 0.87 | 0.86 | 0.84 | 0.82 |
| TCGA-34-5240 | 8,545,634,066  | 241     | 104    | 0.90 | 0.88 | 0.86 | 0.85 | 0.83 | 0.82 |

|              |                |     |     |      |      |      |      |      |      |
|--------------|----------------|-----|-----|------|------|------|------|------|------|
| TCGA-37-3783 | 12,415,899,795 | 350 | 147 | 0.91 | 0.89 | 0.88 | 0.87 | 0.86 | 0.84 |
| TCGA-37-3789 | 4,161,575,983  | 117 | 49  | 0.96 | 0.88 | 0.84 | 0.82 | 0.77 | 0.72 |
| TCGA-37-3792 | 4,017,519,976  | 113 | 48  | 0.96 | 0.88 | 0.84 | 0.83 | 0.78 | 0.74 |
| TCGA-37-4129 | 9,979,067,424  | 281 | 112 | 0.90 | 0.87 | 0.85 | 0.83 | 0.81 | 0.79 |
| TCGA-37-4130 | 13,303,796,722 | 375 | 145 | 0.91 | 0.88 | 0.86 | 0.85 | 0.83 | 0.82 |
| TCGA-37-4132 | 14,301,981,463 | 403 | 167 | 0.91 | 0.89 | 0.88 | 0.87 | 0.85 | 0.84 |
| TCGA-37-4133 | 14,297,535,368 | 403 | 160 | 0.91 | 0.89 | 0.87 | 0.86 | 0.85 | 0.83 |
| TCGA-37-4135 | 12,442,598,168 | 351 | 133 | 0.91 | 0.88 | 0.86 | 0.85 | 0.83 | 0.81 |
| TCGA-37-4141 | 14,836,607,744 | 418 | 171 | 0.91 | 0.89 | 0.87 | 0.87 | 0.85 | 0.84 |
| TCGA-39-5016 | 7,835,857,571  | 221 | 97  | 0.91 | 0.88 | 0.87 | 0.86 | 0.83 | 0.81 |
| TCGA-39-5021 | 7,283,299,503  | 205 | 92  | 0.91 | 0.88 | 0.87 | 0.86 | 0.83 | 0.81 |
| TCGA-39-5029 | 9,051,040,263  | 255 | 113 | 0.91 | 0.88 | 0.87 | 0.86 | 0.84 | 0.82 |
| TCGA-39-5031 | 8,313,103,918  | 234 | 104 | 0.91 | 0.88 | 0.86 | 0.85 | 0.83 | 0.82 |
| TCGA-39-5034 | 8,050,934,046  | 227 | 101 | 0.91 | 0.88 | 0.87 | 0.86 | 0.84 | 0.82 |
| TCGA-39-5036 | 8,608,779,071  | 243 | 108 | 0.91 | 0.88 | 0.87 | 0.86 | 0.84 | 0.82 |
| TCGA-39-5037 | 7,484,557,856  | 211 | 92  | 0.91 | 0.88 | 0.87 | 0.86 | 0.83 | 0.81 |
| TCGA-39-5039 | 8,239,229,818  | 232 | 104 | 0.91 | 0.88 | 0.86 | 0.86 | 0.83 | 0.82 |
| TCGA-43-3394 | 4,256,241,544  | 120 | 49  | 0.96 | 0.88 | 0.85 | 0.83 | 0.79 | 0.74 |
| TCGA-43-3920 | 4,071,027,701  | 115 | 48  | 0.96 | 0.88 | 0.84 | 0.82 | 0.78 | 0.73 |
| TCGA-46-3765 | 4,402,275,644  | 124 | 52  | 0.96 | 0.88 | 0.85 | 0.83 | 0.79 | 0.75 |
| TCGA-46-3766 | 4,311,189,086  | 122 | 52  | 0.96 | 0.88 | 0.85 | 0.83 | 0.79 | 0.76 |
| TCGA-46-3767 | 4,184,819,144  | 118 | 51  | 0.96 | 0.88 | 0.85 | 0.83 | 0.79 | 0.75 |
| TCGA-46-3768 | 4,111,319,395  | 116 | 47  | 0.96 | 0.87 | 0.84 | 0.82 | 0.77 | 0.73 |
| TCGA-46-3769 | 4,095,369,802  | 116 | 49  | 0.96 | 0.88 | 0.85 | 0.83 | 0.78 | 0.74 |
| TCGA-60-2710 | 10,098,222,285 | 285 | 83  | 0.89 | 0.83 | 0.80 | 0.78 | 0.75 | 0.72 |
| TCGA-60-2712 | 14,227,023,353 | 401 | 126 | 0.92 | 0.86 | 0.83 | 0.82 | 0.79 | 0.77 |
| TCGA-60-2713 | 13,028,285,011 | 367 | 115 | 0.91 | 0.85 | 0.83 | 0.81 | 0.79 | 0.76 |
| TCGA-60-2714 | 9,351,256,094  | 264 | 79  | 0.89 | 0.82 | 0.79 | 0.78 | 0.74 | 0.71 |
| TCGA-60-2725 | 14,222,069,039 | 401 | 161 | 0.91 | 0.89 | 0.87 | 0.87 | 0.85 | 0.83 |
| TCGA-63-5131 | 8,604,111,212  | 243 | 108 | 0.91 | 0.88 | 0.87 | 0.86 | 0.84 | 0.82 |
| TCGA-66-2727 | 4,416,764,391  | 125 | 52  | 0.96 | 0.89 | 0.85 | 0.84 | 0.80 | 0.76 |
| TCGA-66-2734 | 4,302,040,338  | 121 | 51  | 0.96 | 0.89 | 0.85 | 0.83 | 0.79 | 0.75 |
| TCGA-66-2744 | 4,218,038,586  | 119 | 50  | 0.96 | 0.88 | 0.85 | 0.83 | 0.79 | 0.74 |
| TCGA-66-2754 | 4,210,956,262  | 119 | 50  | 0.96 | 0.88 | 0.85 | 0.83 | 0.78 | 0.74 |
| TCGA-66-2763 | 10,736,508,568 | 303 | 98  | 0.88 | 0.84 | 0.82 | 0.80 | 0.78 | 0.75 |
| TCGA-66-2771 | 4,079,286,873  | 115 | 48  | 0.96 | 0.88 | 0.85 | 0.83 | 0.79 | 0.75 |
| TCGA-66-2773 | 13,694,424,493 | 386 | 159 | 0.92 | 0.89 | 0.88 | 0.87 | 0.86 | 0.84 |
| TCGA-66-2786 | 9,055,557,868  | 255 | 81  | 0.88 | 0.83 | 0.81 | 0.79 | 0.76 | 0.73 |
| TCGA-66-2787 | 4,104,207,344  | 116 | 49  | 0.96 | 0.88 | 0.84 | 0.82 | 0.78 | 0.74 |
| TCGA-66-2788 | 4,539,552,175  | 128 | 55  | 0.96 | 0.89 | 0.86 | 0.84 | 0.80 | 0.77 |
| TCGA-66-2789 | 4,212,564,207  | 119 | 50  | 0.96 | 0.88 | 0.85 | 0.83 | 0.79 | 0.75 |
| TCGA-66-2791 | 4,156,739,917  | 117 | 50  | 0.96 | 0.88 | 0.85 | 0.83 | 0.79 | 0.75 |
| TCGA-66-2792 | 4,493,422,516  | 127 | 52  | 0.96 | 0.88 | 0.85 | 0.83 | 0.79 | 0.75 |
| TCGA-66-2793 | 9,753,884,949  | 275 | 96  | 0.91 | 0.88 | 0.86 | 0.85 | 0.82 | 0.79 |

|              |                |     |     |      |      |      |      |      |      |
|--------------|----------------|-----|-----|------|------|------|------|------|------|
| TCGA-66-2794 | 12,397,201,961 | 350 | 139 | 0.91 | 0.88 | 0.87 | 0.86 | 0.84 | 0.82 |
| TCGA-66-2795 | 4,366,012,613  | 123 | 51  | 0.96 | 0.88 | 0.85 | 0.83 | 0.79 | 0.75 |
| TCGA-66-2800 | 12,633,768,174 | 356 | 143 | 0.91 | 0.89 | 0.88 | 0.87 | 0.85 | 0.83 |
| TCGA-21-1070 | 10,840,578,700 | 306 | 104 | 0.91 | 0.85 | 0.82 | 0.81 | 0.78 | 0.75 |
| TCGA-21-1071 | 10,569,758,173 | 298 | 101 | 0.91 | 0.85 | 0.82 | 0.81 | 0.78 | 0.76 |
| TCGA-21-1075 | 11,041,900,432 | 311 | 105 | 0.91 | 0.85 | 0.83 | 0.82 | 0.79 | 0.76 |
| TCGA-21-1076 | 11,242,814,951 | 317 | 108 | 0.91 | 0.84 | 0.82 | 0.81 | 0.78 | 0.75 |
| TCGA-21-1077 | 11,220,170,037 | 316 | 111 | 0.91 | 0.86 | 0.83 | 0.82 | 0.80 | 0.77 |
| TCGA-21-1078 | 7,000,932,359  | 197 | 55  | 0.88 | 0.79 | 0.75 | 0.73 | 0.68 | 0.63 |
| TCGA-21-1079 | 2,946,369,183  | 83  | 38  | 0.88 | 0.81 | 0.77 | 0.75 | 0.70 | 0.64 |
| TCGA-22-0940 | 10,897,440,268 | 307 | 101 | 0.91 | 0.84 | 0.82 | 0.80 | 0.77 | 0.75 |
| TCGA-22-0944 | 10,179,610,174 | 287 | 72  | 0.70 | 0.66 | 0.64 | 0.63 | 0.61 | 0.60 |
| TCGA-22-1000 | 9,661,496,257  | 272 | 96  | 0.91 | 0.86 | 0.83 | 0.82 | 0.79 | 0.77 |
| TCGA-22-1012 | 10,561,504,077 | 298 | 103 | 0.91 | 0.86 | 0.83 | 0.82 | 0.79 | 0.77 |
| TCGA-22-1016 | 10,558,829,761 | 298 | 92  | 0.90 | 0.84 | 0.81 | 0.80 | 0.76 | 0.73 |
| TCGA-34-2596 | 11,000,206,013 | 310 | 97  | 0.90 | 0.84 | 0.81 | 0.80 | 0.77 | 0.74 |
| TCGA-43-2576 | 10,234,315,776 | 289 | 73  | 0.89 | 0.81 | 0.78 | 0.76 | 0.72 | 0.69 |
| TCGA-43-2578 | 11,463,152,944 | 323 | 102 | 0.90 | 0.84 | 0.82 | 0.81 | 0.78 | 0.75 |
| TCGA-43-2581 | 10,983,203,424 | 310 | 99  | 0.91 | 0.85 | 0.82 | 0.81 | 0.78 | 0.76 |
| TCGA-56-1622 | 10,583,297,149 | 298 | 99  | 0.91 | 0.85 | 0.83 | 0.81 | 0.78 | 0.76 |
| TCGA-60-2695 | 10,465,019,022 | 295 | 94  | 0.90 | 0.84 | 0.81 | 0.80 | 0.77 | 0.74 |
| TCGA-60-2696 | 10,573,536,860 | 298 | 91  | 0.90 | 0.84 | 0.81 | 0.79 | 0.76 | 0.73 |
| TCGA-60-2698 | 11,137,370,949 | 314 | 99  | 0.90 | 0.84 | 0.82 | 0.80 | 0.77 | 0.75 |
| TCGA-60-2706 | 5,655,220,094  | 159 | 7   | 0.67 | 0.28 | 0.15 | 0.10 | 0.04 | 0.02 |
| TCGA-60-2707 | 7,111,733,866  | 201 | 59  | 0.88 | 0.81 | 0.77 | 0.75 | 0.71 | 0.68 |
| TCGA-60-2708 | 7,695,626,963  | 217 | 63  | 0.88 | 0.81 | 0.78 | 0.76 | 0.72 | 0.69 |
| TCGA-60-2711 | 5,622,363,484  | 159 | 27  | 0.84 | 0.71 | 0.63 | 0.58 | 0.46 | 0.37 |
| TCGA-60-2715 | 5,243,020,011  | 148 | 26  | 0.83 | 0.68 | 0.60 | 0.54 | 0.43 | 0.33 |
| TCGA-60-2716 | 11,335,839,649 | 320 | 98  | 0.90 | 0.84 | 0.81 | 0.80 | 0.77 | 0.75 |
| TCGA-60-2720 | 3,056,333,066  | 86  | 35  | 0.86 | 0.78 | 0.74 | 0.71 | 0.66 | 0.61 |
| TCGA-60-2721 | 2,734,315,330  | 77  | 33  | 0.87 | 0.78 | 0.73 | 0.71 | 0.65 | 0.59 |
| TCGA-60-2722 | 10,289,975,661 | 290 | 84  | 0.90 | 0.83 | 0.80 | 0.79 | 0.76 | 0.73 |
| TCGA-60-2723 | 10,975,250,101 | 310 | 100 | 0.90 | 0.84 | 0.82 | 0.81 | 0.78 | 0.75 |
| TCGA-60-2724 | 10,752,143,362 | 303 | 99  | 0.90 | 0.84 | 0.81 | 0.80 | 0.77 | 0.75 |
| TCGA-60-2726 | 10,601,802,168 | 299 | 95  | 0.90 | 0.84 | 0.81 | 0.80 | 0.77 | 0.74 |
| TCGA-66-2756 | 10,398,860,675 | 293 | 87  | 0.88 | 0.83 | 0.80 | 0.79 | 0.76 | 0.73 |
| TCGA-66-2759 | 7,694,961,304  | 217 | 64  | 0.87 | 0.81 | 0.78 | 0.76 | 0.72 | 0.68 |
| TCGA-66-2765 | 5,621,684,473  | 159 | 12  | 0.75 | 0.46 | 0.31 | 0.24 | 0.13 | 0.08 |
| TCGA-66-2766 | 8,896,963,614  | 251 | 71  | 0.88 | 0.82 | 0.79 | 0.78 | 0.74 | 0.71 |
| TCGA-66-2769 | 5,713,005,697  | 161 | 41  | 0.86 | 0.78 | 0.73 | 0.71 | 0.64 | 0.57 |
| TCGA-66-2780 | 8,169,834,940  | 230 | 68  | 0.86 | 0.80 | 0.77 | 0.75 | 0.71 | 0.68 |
| TCGA-66-2781 | 5,479,945,892  | 155 | 25  | 0.82 | 0.68 | 0.59 | 0.54 | 0.42 | 0.32 |

---



**Table S4** Summary of analysis datasets

| <b>Datasets</b>                           | <b>Number of sample</b> | <b>Number of genes</b> |
|-------------------------------------------|-------------------------|------------------------|
| <b>Ding's<sup>1</sup></b>                 | <b>188</b>              | <b>623</b>             |
| <b>LUAD<sup>2</sup></b>                   | <b>119</b>              | <b>7,755</b>           |
| <b>LUSC<sup>3</sup></b>                   | <b>127</b>              | <b>11,125</b>          |
| <b>Non-hypermuted<br/>CRC<sup>4</sup></b> | <b>194</b>              | <b>9,252</b>           |
| <b>HGS-OvCa<sup>5</sup></b>               | <b>316</b>              | <b>9,965</b>           |

1. Ding, L., Getz, G., Wheeler, D.A., Mardis, E.R., McLellan, M.D., Cibulskis, K., Sougnez, C., Greulich, H., Muzny, D.M., Morgan, M.B., et al. (2008). Somatic mutations affect key pathways in lung adenocarcinoma. *Nature* 455, 1069-1075.
2. The TCGA database: <http://cancergenome.nih.gov/>.
3. Cancer Genome Atlas Research Network. (2012). Comprehensive genomic characterization of squamous cell lung cancers. *Nature* 489, 519-525.
4. Cancer Genome Atlas Research Network. (2012). Comprehensive molecular characterization of human colon and rectal cancer. *Nature* 487, 330-337.
5. Cancer Genome Atlas Research Network. (2011). Integrated genomic analyses of ovarian carcinoma. *Nature* 474, 609-615.

**Table S5** Driver genes in the study of Ding *et al.*

| Gene     | Silent | Missense | Nonsense | Splicing | Fs_Indel | nFs_Indel | avg_alpha | #_pa | p_adj    | Methods |
|----------|--------|----------|----------|----------|----------|-----------|-----------|------|----------|---------|
| KRAS     | 1      | 61       | 0        | 0        | 0        | 0         | 4.22E-04  | 4    | 8.4E-129 | Both    |
| TP53     | 1      | 41       | 10       | 6        | 6        | 1         | 2.94E-04  | 18   | 4.4E-102 | Both    |
| STK11    | 0      | 9        | 9        | 5        | 9        | 0         | 1.95E-04  | 14   | 2.42E-52 | Both    |
| EGFR     | 0      | 21       | 0        | 0        | 0        | 13        | 1.73E-05  | 5    | 1.73E-49 | Both    |
| NF1      | 0      | 6        | 4        | 5        | 1        | 0         | 6.26E-05  | 11   | 1.89E-11 | Both    |
| CDKN2A   | 0      | 7        | 0        | 0        | 2        | 0         | 3.64E-05  | 7    | 2.29E-09 | Both    |
| INSRR    | 3      | 5        | 0        | 1        | 0        | 0         | 8.35E-05  | 5    | 1.72E-07 | DrGaP   |
| APC      | 0      | 5        | 3        | 1        | 3        | 1         | 5.92E-05  | 8    | 1.43E-06 | Both    |
| ATM      | 0      | 10       | 1        | 1        | 2        | 0         | 1.45E-05  | 11   | 2.16E-06 | Both    |
| PTPRD    | 3      | 10       | 0        | 0        | 0        | 0         | 2.06E-05  | 7    | 2.18E-06 | Both    |
| RB1      | 0      | 0        | 4        | 2        | 1        | 0         | 1.63E-04  | 6    | 2.37E-06 | Both    |
| EPHA3    | 0      | 11       | 0        | 0        | 0        | 0         | 4.17E-05  | 5    | 4.57E-06 | Both    |
| FGFR4    | 0      | 5        | 0        | 0        | 2        | 0         | 2.23E-05  | 4    | 1.21E-05 | Both    |
| LRP1B    | 0      | 17       | 0        | 0        | 0        | 0         | 1.15E-05  | 6    | 5.61E-05 | Both    |
| NTRK3    | 2      | 7        | 0        | 0        | 0        | 0         | 3.10E-05  | 4    | 2.32E-04 | Both    |
| ERBB4    | 2      | 9        | 0        | 0        | 0        | 0         | 1.38E-05  | 6    | 2.53E-04 | Both    |
| EPHA7    | 0      | 4        | 1        | 0        | 1        | 0         | 2.35E-04  | 5    | 4.25E-04 | Both    |
| KDR      | 1      | 6        | 1        | 0        | 0        | 1         | 7.46E-05  | 5    | 4.41E-04 | Both    |
| NTRK1    | 0      | 6        | 1        | 0        | 0        | 0         | 2.56E-05  | 6    | 4.47E-04 | Both    |
| ZMYND10  | 1      | 4        | 0        | 0        | 0        | 0         | 1.16E-04  | 2    | 5.33E-04 | Both    |
| PTEN     | 1      | 3        | 1        | 0        | 0        | 0         | 1.54E-04  | 4    | 6.52E-04 | Both    |
| LTK      | 0      | 3        | 2        | 1        | 0        | 0         | 1.65E-04  | 5    | 1.73E-03 | Both    |
| MYO3B    | 1      | 7        | 0        | 0        | 0        | 0         | 2.47E-05  | 5    | 2.15E-03 | Both    |
| PDGFRA   | 2      | 6        | 1        | 0        | 0        | 0         | 1.90E-05  | 6    | 3.16E-03 | Both    |
| DOCK3    | 7      | 5        | 0        | 1        | 0        | 0         | 8.09E-06  | 6    | 3.30E-03 | DrGaP   |
| PAK4     | 0      | 2        | 1        | 0        | 0        | 0         | 2.66E-03  | 2    | 4.07E-03 | DrGaP   |
| PIK3C3   | 0      | 6        | 0        | 0        | 0        | 0         | 1.04E-05  | 3    | 4.09E-03 | DrGaP   |
| FLT4     | 0      | 5        | 0        | 0        | 0        | 0         | 1.02E-05  | 4    | 4.23E-03 | DrGaP   |
| PAK7     | 0      | 4        | 0        | 0        | 0        | 0         | 6.03E-05  | 3    | 4.23E-03 | DrGaP   |
| NRAS     | 0      | 3        | 0        | 0        | 0        | 0         | 6.19E-05  | 1    | 4.38E-03 | Both    |
| LMTK2    | 0      | 4        | 0        | 0        | 1        | 0         | 4.40E-05  | 2    | 4.87E-03 | DrGaP   |
| TEC      | 0      | 3        | 0        | 0        | 0        | 0         | 1.13E-04  | 3    | 5.07E-03 | DrGaP   |
| PRKCG    | 0      | 4        | 0        | 0        | 0        | 0         | 8.90E-06  | 3    | 5.56E-03 | DrGaP   |
| INHBA    | 0      | 3        | 1        | 0        | 1        | 0         | 3.30E-05  | 3    | 7.03E-03 | Both    |
| CDC42BPA | 1      | 5        | 0        | 0        | 0        | 0         | 4.44E-06  | 3    | 8.00E-03 | DrGaP   |
| PAK3     | 0      | 5        | 0        | 0        | 0        | 0         | 1.73E-05  | 2    | 8.46E-03 | Both    |
| SLC38A3  | 1      | 3        | 0        | 0        | 0        | 0         | 5.39E-05  | 2    | 8.57E-03 | DrGaP   |
| JAK2     | 2      | 4        | 0        | 0        | 1        | 0         | 2.74E-05  | 3    | 8.78E-03 | DrGaP   |
| BAP1     | 0      | 0        | 2        | 0        | 0        | 0         | 1.36E-03  | 2    | 9.49E-03 | DrGaP   |
| PIK3CG   | 0      | 4        | 1        | 0        | 0        | 0         | 2.04E-05  | 4    | 9.52E-03 | DrGaP   |
| ROR2     | 0      | 5        | 0        | 0        | 0        | 0         | 1.02E-05  | 4    | 9.56E-03 | DrGaP   |
| CDH11    | 0      | 5        | 0        | 1        | 0        | 0         | 3.08E-05  | 4    | 9.69E-03 | Both    |
| EPHA5    | 0      | 6        | 0        | 1        | 0        | 0         | 3.50E-05  | 4    | 9.90E-03 | Both    |
| MSH6     | 0      | 3        | 1        | 0        | 0        | 0         | 3.24E-05  | 4    | 1.28E-02 | DrGaP   |
| ERAS     | 0      | 1        | 1        | 0        | 0        | 0         | 2.13E-04  | 2    | 1.63E-02 | DrGaP   |
| ROBO1    | 0      | 3        | 0        | 0        | 1        | 0         | 8.18E-06  | 1    | 1.66E-02 | DrGaP   |
| MKNK2    | 0      | 1        | 1        | 0        | 0        | 0         | 9.19E-05  | 2    | 2.03E-02 | DrGaP   |
| CDK17    | 0      | 2        | 0        | 0        | 0        | 0         | 6.85E-05  | 2    | 2.24E-02 | DrGaP   |
| ACVR1B   | 0      | 0        | 1        | 0        | 1        | 0         | 6.92E-05  | 2    | 2.79E-02 | DrGaP   |
| LMTK3    | 1      | 3        | 1        | 0        | 0        | 0         | 4.36E-05  | 2    | 2.80E-02 | DrGaP   |
| NTRK2    | 1      | 6        | 0        | 0        | 0        | 0         | 7.83E-06  | 3    | 2.83E-02 | Both    |
| MKNK1    | 0      | 2        | 0        | 0        | 0        | 0         | 2.20E-05  | 1    | 2.88E-02 | DrGaP   |
| RET      | 0      | 2        | 1        | 0        | 0        | 0         | 2.19E-05  | 3    | 3.03E-02 | DrGaP   |
| SMAD4    | 0      | 2        | 1        | 0        | 0        | 0         | 3.12E-05  | 3    | 3.22E-02 | DrGaP   |
| IRAK2    | 0      | 1        | 0        | 1        | 1        | 0         | 5.35E-05  | 3    | 3.45E-02 | DrGaP   |
| GNAS     | 0      | 6        | 0        | 0        | 1        | 0         | 7.69E-06  | 6    | 3.55E-02 | DrGaP   |
| TP63     | 0      | 3        | 1        | 0        | 0        | 0         | 3.92E-05  | 2    | 4.02E-02 | DrGaP   |

|       |   |   |   |   |   |   |          |   |          |           |
|-------|---|---|---|---|---|---|----------|---|----------|-----------|
| FOS   | 0 | 1 | 0 | 0 | 1 | 0 | 9.91E-06 | 2 | 4.04E-02 | DrGaP     |
| GATA1 | 0 | 1 | 1 | 0 | 0 | 0 | 6.34E-05 | 2 | 4.17E-02 | DrGaP     |
| TFDP1 | 0 | 3 | 0 | 1 | 0 | 0 | 4.34E-05 | 4 | 7.05E-02 | Ding/Youn |

---

**Note:** #\_pa is the number of positive alpha. Both refers the genes that are identified by both DrGaP and Ding/Youn's methods.

**Table S6 Comparison of significance of pathway analysis in the study of Ding *et al.***

| KEGG_ID  | Pathway               | TSP Fisher<br>p-value | TSP Fisher<br>FDR | TSP binomial<br>p-value | TSP binomial<br>FDR | PathScan<br>p-value | PathScan<br>FDR | DrGaP<br>p-value | DrGaP<br>FDR |
|----------|-----------------------|-----------------------|-------------------|-------------------------|---------------------|---------------------|-----------------|------------------|--------------|
| hsa04540 | Gap junction          | 3.60E-37              | 2.50E-36          | 4.10E-44                | 2.90E-43            | 4.00E-34            | 3.50E-38        | 2.66E-78         | 2.50E-77     |
| hsa04320 | Dorso-ventral         | 1.50E-28              | 8.40E-28          | 1.70E-34                | 8.80E-34            | 1.80E-23            | 1.00E-22        | 9.09E-63         | 5.84E-62     |
| hsa04115 | p53 signaling         | 8.00E-25              | 4.00E-24          | 1.10E-31                | 4.80E-31            | 4.90E-22            | 2.20E-21        | 1.22E-56         | 6.46E-56     |
| hsa04530 | Tight junction        | 1.10E-23              | 5.50E-23          | 3.90E-30                | 1.50E-29            | 4.80E-24            | 3.00E-23        | 1.80E-52         | 8.43E-52     |
| hsa04912 | GnRH signaling        | 5.00E-23              | 2.20E-22          | 3.90E-33                | 2.00E-32            | 1.50E-22            | 6.90E-22        | 5.88E-62         | 3.58E-61     |
| hsa04010 | MAPK signaling        | 2.10E-20              | 8.80E-20          | 2.10E-43                | 1.30E-42            | 6.40E-44            | 6.90E-43        | 4.57E-92         | 4.64E-91     |
| hsa04310 | Wnt signaling         | 2.20E-20              | 8.80E-20          | 1.10E-28                | 3.90E-28            | 3.90E-22            | 1.80E-21        | 6.61E-47         | 2.60E-46     |
| hsa04150 | mTOR signaling        | 3.50E-20              | 1.30E-19          | 1.60E-32                | 7.80E-32            | 4.80E-05            | 1.20E-04        | 3.65E-18         | 8.40E-18     |
| hsa04210 | Apoptosis             | 1.20E-16              | 4.40E-16          | 5.90E-27                | 2.10E-26            | 3.20E-23            | 1.70E-22        | 8.59E-51         | 3.74E-50     |
| hsa04662 | B cell receptor       | 1.30E-15              | 4.50E-15          | 9.80E-24                | 3.00E-23            | 7.80E-13            | 2.70E-12        | 8.90E-35         | 2.52E-34     |
| hsa04810 | actin cytoskel.       | 2.30E-15              | 7.70E-15          | 7.10E-32                | 3.20E-31            | 9.60E-29            | 6.50E-28        | 4.67E-76         | 3.80E-75     |
| hsa04360 | Axon guidance         | 1.20E-11              | 3.80E-11          | 3.40E-25                | 1.20E-24            | 2.10E-23            | 1.10E-22        | 1.33E-50         | 5.61E-50     |
| hsa04370 | VEGF signaling        | 3.40E-11              | 1.00E-10          | 7.70E-21                | 2.30E-20            | 1.60E-16            | 6.10E-16        | 3.02E-44         | 1.08E-43     |
| hsa04020 | Calcium signal.       | 3.90E-10              | 1.20E-09          | 2.80E-18                | 7.40E-18            | 9.00E-14            | 3.20E-13        | 1.80E-39         | 5.78E-39     |
| hsa04012 | ErbB signaling        | 9.20E-10              | 2.60E-09          | 4.80E-25                | 1.60E-24            | 4.80E-19            | 1.90E-18        | 4.17E-64         | 2.83E-63     |
| hsa04110 | Cell cycle            | 1.80E-08              | 4.90E-08          | 1.50E-20                | 4.20E-20            | 4.70E-17            | 1.80E-16        | 8.74E-45         | 3.23E-44     |
| hsa04660 | T cell receptor       | 1.90E-07              | 5.00E-07          | 3.20E-18                | 8.40E-18            | 9.40E-12            | 3.10E-11        | 1.81E-36         | 5.38E-36     |
| hsa04650 | Killer cell tox.      | 5.50E-06              | 1.40E-05          | 4.10E-16                | 1.00E-15            | 2.80E-13            | 9.80E-13        | 2.03E-37         | 6.36E-37     |
| hsa04620 | Toll-like recep.      | 1.20E-05              | 3.00E-05          | 0.981                   | 1                   | 0.926               | 0.948           | 0.070            | 0.101        |
| hsa04920 | Adipocytokine         | 6.80E-05              | 1.60E-04          | 7.40E-11                | 1.60E-10            | 4.40E-09            | 1.20E-08        | 3.23E-26         | 7.57E-26     |
| hsa04060 | Cytokine recep.       | 9.00E-05              | 2.10E-04          | 9.30E-13                | 2.20E-12            | 6.00E-10            | 1.70E-09        | 2.33E-37         | 7.10E-37     |
| hsa04664 | Fc epsilon RI         | 1.50E-04              | 3.40E-04          | 3.80E-13                | 9.00E-13            | 1.80E-10            | 5.60E-10        | 2.55E-31         | 6.34E-31     |
| hsa04630 | Jak-STAT sig.         | 2.60E-04              | 5.60E-04          | 0.785                   | 1                   | 0.654               | 0.767           | 0.00162          | 0.00299      |
| hsa04914 | Progesterone oocyte   | 9.30E-04              | 2.00E-03          | 2.60E-12                | 5.90E-12            | 2.10E-10            | 6.10E-10        | 9.23E-35         | 2.56E-34     |
| hsa04670 | Leukocyte migration   | 1.30E-03              | 2.70E-03          | 0.634                   | 0.874               | 0.464               | 0.739           | 0.0334           | 0.04969      |
| hsa04520 | Adherens junction     | 3.90E-03              | 7.90E-03          | 2.20E-09                | 4.60E-09            | 2.60E-06            | 6.70E-06        | 1.03E-31         | 2.62E-31     |
| hsa04930 | Type 2 diabetes mel.  | 7.30E-03              | 0.014             | 0.767                   | 1                   | 0.565               | 0.721           | 0.00419          | 0.0072       |
| hsa04330 | Notch signaling       | 7.60E-03              | 0.015             | 0.817                   | 1                   | 0.68                | 0.79            | 0.58163          | 0.64508      |
| hsa04120 | Ubiquitin proteolys.  | 0.01                  | 0.02              | 0.965                   | 1                   | 0.9                 | 0.929           | 0.58943          | 0.64784      |
| hsa04350 | TGF-beta signaling    | 0.014                 | 0.026             | 0.409                   | 0.664               | 0.496               | 0.703           | 0.02351          | 0.03586      |
| hsa04910 | Insulin signaling     | 0.025                 | 0.045             | 3.10E-11                | 6.90E-11            | 2.70E-10            | 7.70E-10        | 1.06E-32         | 2.89E-32     |
| hsa04742 | Taste transduction    | 0.051                 | 0.091             | 1.10E-03                | 2.20E-03            | 0.01                | 0.025           | 0.01262          | 0.0204       |
| hsa04340 | Hedgehog signaling    | 0.104                 | 0.181             | 0.574                   | 0.804               | 0.144               | 0.282           | 0.14363          | 0.19047      |
| hsa04640 | Hematopo. cell lin.   | 0.106                 | 0.181             | 0.881                   | 1                   | 0.704               | 0.804           | 0.88474          | 0.91473      |
| hsa05010 | Alzheimers disease    | 0.188                 | 0.317             | 1.50E-03                | 2.80E-03            | 0.526               | 0.692           | 0.82769          | 0.8705       |
| hsa04070 | Phosphatidyl. sig.    | 0.195                 | 0.317             | 0.089                   | 0.165               | 0.081               | 0.171           | 0.00036          | 0.00076      |
| hsa05120 | Epith. sig. H. pylori | 0.21                  | 0.335             | 3.30E-05                | 6.60E-05            | 1.70E-03            | 4.30E-03        | 2.63E-27         | 6.29E-27     |
| hsa04510 | Focal adhesion        | 0.738                 | 1                 | 3.60E-08                | 7.40E-08            | 2.00E-09            | 5.50E-09        | 6.70E-36         | 1.94E-35     |
| hsa04740 | Olfactory transduc.   | 0.803                 | 1                 | 0.297                   | 0.501               | 0.33                | 0.617           | 0.44741          | 0.54043      |
| hsa00562 | Inositol phos. metab. | 0.95                  | 1                 | 0.04                    | 0.075               | 0.082               | 0.171           | 0.00289          | 0.0051       |
| hsa04080 | Neuroactive interac.  | 1                     | 1                 | 0.148                   | 0.27                | 0.15                | 0.288           | 0.06789          | 0.09979      |
| hsa00450 | Selenoamino. met.     | 1                     | 1                 | 1                       | 1                   | 0.415               | 0.704           | NA               | NA           |

**Note:**

TSP Fisher's and binomial tests for significantly mutated KEGG pathways were originally performed by Ding *et al.* (Nature 455: 1069-1075, 2008). PathScan tests for KEGG pathways were originally performed by Wendl *et al.* (Bioinformatics 27:1595-1602, 2011).

**Table S7** Driver genes in LUAD

| gene     | silent | missense | nonsense | splicing | Fs_indel | nFs_indel | avg_alpha | #_pa | p_adj    |
|----------|--------|----------|----------|----------|----------|-----------|-----------|------|----------|
| TP53     | 0      | 19       | 4        | 2        | 3        | 0         | 3.22E-04  | 13   | 2.21E-29 |
| KRAS     | 0      | 18       | 0        | 0        | 0        | 0         | 1.95E-04  | 4    | 8.59E-24 |
| GPRIN2   | 0      | 4        | 0        | 0        | 0        | 4         | 4.71E-05  | 2    | 1.26E-12 |
| RYR2     | 5      | 39       | 3        | 0        | 1        | 0         | 1.57E-05  | 9    | 6.19E-09 |
| PABPC1   | 2      | 9        | 0        | 0        | 0        | 0         | 7.34E-05  | 4    | 2.61E-08 |
| KRTAP5-1 | 0      | 0        | 0        | 0        | 0        | 4         | 4.15E-05  | 1    | 2.94E-08 |
| PRR21    | 0      | 4        | 0        | 0        | 3        | 0         | 3.19E-05  | 3    | 2.04E-06 |
| IGSF3    | 0      | 1        | 0        | 0        | 0        | 3         | 6.06E-06  | 2    | 6.38E-06 |
| KEAP1    | 0      | 9        | 2        | 0        | 1        | 0         | 5.65E-05  | 10   | 8.00E-06 |
| TMPRSS13 | 0      | 0        | 0        | 0        | 0        | 3         | 1.53E-05  | 1    | 9.34E-06 |
| COL11A1  | 2      | 16       | 1        | 3        | 0        | 0         | 1.64E-04  | 7    | 2.14E-05 |
| CCT8L2   | 1      | 10       | 0        | 0        | 0        | 0         | 7.02E-05  | 4    | 3.83E-05 |
| CDH10    | 1      | 11       | 1        | 0        | 0        | 0         | 1.45E-04  | 4    | 4.12E-05 |
| NAV3     | 1      | 13       | 0        | 0        | 1        | 0         | 1.03E-05  | 4    | 4.37E-05 |
| LRP1B    | 6      | 26       | 3        | 0        | 1        | 0         | 2.60E-05  | 8    | 1.99E-04 |
| REG1B    | 0      | 5        | 0        | 0        | 0        | 0         | 3.24E-04  | 3    | 2.07E-04 |
| CSMD3    | 7      | 29       | 1        | 0        | 0        | 0         | 1.11E-05  | 5    | 2.50E-04 |
| EGFR     | 0      | 5        | 0        | 0        | 0        | 1         | 1.65E-05  | 4    | 3.76E-04 |
| THSD7A   | 0      | 13       | 0        | 0        | 0        | 0         | 5.34E-05  | 4    | 3.93E-04 |
| ZAN      | 4      | 2        | 0        | 0        | 4        | 0         | 2.87E-06  | 2    | 6.23E-04 |
| NMUR2    | 2      | 7        | 0        | 0        | 0        | 0         | 1.66E-04  | 4    | 6.39E-04 |
| NLGN4X   | 3      | 11       | 0        | 0        | 1        | 0         | 3.77E-05  | 5    | 6.89E-04 |
| FAM5C    | 3      | 7        | 0        | 1        | 0        | 0         | 9.03E-05  | 6    | 7.73E-04 |
| RP1L1    | 5      | 16       | 1        | 0        | 0        | 0         | 3.95E-05  | 7    | 7.81E-04 |
| GRM1     | 1      | 10       | 1        | 0        | 0        | 0         | 2.29E-04  | 7    | 9.04E-04 |
| KRTAP5-5 | 1      | 1        | 0        | 0        | 0        | 3         | 4.07E-05  | 2    | 1.16E-03 |
| KRTAP4-5 | 0      | 0        | 0        | 0        | 0        | 3         | 4.76E-05  | 1    | 1.52E-03 |
| QRICH2   | 0      | 0        | 0        | 0        | 0        | 4         | 6.90E-06  | 1    | 1.56E-03 |
| ZFHX4    | 7      | 21       | 2        | 0        | 0        | 0         | 1.23E-05  | 8    | 1.74E-03 |
| NTRK1    | 1      | 1        | 0        | 4        | 0        | 0         | 4.14E-04  | 1    | 1.92E-03 |
| SPTA1    | 3      | 10       | 5        | 0        | 0        | 0         | 8.73E-05  | 6    | 1.97E-03 |
| MUC17    | 4      | 17       | 2        | 0        | 0        | 0         | 2.76E-05  | 9    | 2.13E-03 |
| SMPD1    | 0      | 1        | 0        | 0        | 0        | 2         | 9.17E-06  | 1    | 2.97E-03 |
| ZNF804A  | 1      | 11       | 1        | 0        | 0        | 0         | 7.55E-05  | 3    | 3.21E-03 |
| C17orf97 | 0      | 0        | 0        | 0        | 0        | 3         | 2.04E-05  | 1    | 3.37E-03 |
| ADAMTS12 | 4      | 7        | 1        | 0        | 0        | 0         | 2.94E-05  | 4    | 3.39E-03 |
| PRDM9    | 3      | 6        | 3        | 1        | 0        | 0         | 7.53E-05  | 6    | 3.93E-03 |
| RIMS2    | 0      | 9        | 0        | 0        | 0        | 0         | 5.74E-05  | 3    | 3.99E-03 |
| CDH9     | 4      | 6        | 0        | 0        | 0        | 0         | 1.16E-04  | 3    | 4.01E-03 |
| NEFH     | 6      | 0        | 0        | 0        | 0        | 2         | 5.67E-06  | 1    | 4.26E-03 |
| ZNF492   | 0      | 0        | 0        | 2        | 0        | 0         | 8.69E-03  | 1    | 4.31E-03 |

|          |   |    |   |   |   |   |          |   |          |
|----------|---|----|---|---|---|---|----------|---|----------|
| ARSF     | 1 | 3  | 1 | 2 | 1 | 0 | 9.24E-05 | 7 | 4.33E-03 |
| TCERG1   | 0 | 0  | 0 | 0 | 0 | 2 | 5.27E-06 | 1 | 4.45E-03 |
| TNR      | 6 | 6  | 1 | 1 | 0 | 0 | 6.79E-05 | 4 | 4.67E-03 |
| PXDNL    | 3 | 7  | 1 | 1 | 0 | 0 | 1.20E-04 | 5 | 4.91E-03 |
| FAM120B  | 0 | 4  | 0 | 0 | 0 | 1 | 4.12E-05 | 4 | 4.97E-03 |
| EPHA6    | 0 | 9  | 0 | 0 | 0 | 0 | 4.96E-05 | 3 | 5.46E-03 |
| FAM47B   | 0 | 6  | 2 | 0 | 0 | 0 | 8.55E-05 | 5 | 6.16E-03 |
| HAVCR1   | 2 | 5  | 0 | 0 | 0 | 0 | 3.70E-05 | 3 | 6.17E-03 |
| ZNF536   | 5 | 9  | 2 | 1 | 1 | 0 | 8.41E-05 | 7 | 8.56E-03 |
| ZW10     | 0 | 3  | 0 | 2 | 0 | 0 | 2.90E-03 | 3 | 9.00E-03 |
| FAT3     | 6 | 17 | 1 | 1 | 0 | 0 | 1.59E-04 | 8 | 9.06E-03 |
| C15orf2  | 1 | 8  | 0 | 0 | 0 | 0 | 4.44E-05 | 3 | 9.07E-03 |
| KCNJ12   | 3 | 5  | 0 | 0 | 1 | 0 | 3.57E-05 | 5 | 9.18E-03 |
| CD33     | 1 | 3  | 1 | 0 | 0 | 0 | 1.72E-04 | 4 | 9.21E-03 |
| LGMN     | 0 | 2  | 0 | 0 | 1 | 0 | 8.12E-06 | 3 | 9.24E-03 |
| ATP8A2   | 1 | 3  | 1 | 2 | 0 | 0 | 5.69E-05 | 5 | 9.31E-03 |
| KIAA0748 | 0 | 2  | 1 | 0 | 1 | 0 | 7.32E-04 | 4 | 9.91E-03 |
| LILRB1   | 3 | 6  | 1 | 0 | 0 | 0 | 1.59E-04 | 5 | 1.01E-02 |
| FMN2     | 3 | 6  | 0 | 0 | 0 | 2 | 2.99E-06 | 4 | 1.01E-02 |
| SLIT3    | 3 | 4  | 2 | 1 | 1 | 0 | 6.78E-05 | 5 | 1.11E-02 |
| NALCN    | 0 | 10 | 2 | 2 | 0 | 0 | 3.18E-05 | 7 | 1.19E-02 |
| GRID2    | 2 | 6  | 1 | 0 | 1 | 0 | 1.62E-04 | 5 | 1.21E-02 |
| FCRL1    | 1 | 4  | 0 | 1 | 0 | 0 | 1.46E-03 | 3 | 1.26E-02 |
| TMEM117  | 2 | 1  | 2 | 0 | 1 | 0 | 8.68E-05 | 3 | 1.30E-02 |
| MMP1     | 1 | 5  | 0 | 0 | 0 | 0 | 1.77E-05 | 4 | 1.30E-02 |
| ADAMTS16 | 1 | 8  | 1 | 1 | 0 | 0 | 3.67E-05 | 5 | 1.32E-02 |
| NETO1    | 2 | 4  | 0 | 1 | 0 | 0 | 2.80E-04 | 4 | 1.45E-02 |
| ENOX1    | 0 | 2  | 1 | 0 | 1 | 0 | 9.18E-05 | 4 | 1.46E-02 |
| HDAC9    | 0 | 6  | 0 | 2 | 0 | 0 | 4.00E-05 | 6 | 1.46E-02 |
| GPRC6A   | 0 | 6  | 0 | 0 | 0 | 0 | 1.53E-05 | 3 | 1.50E-02 |
| ZP4      | 1 | 1  | 0 | 2 | 2 | 0 | 4.25E-04 | 3 | 1.51E-02 |
| SF3B4    | 0 | 2  | 0 | 0 | 1 | 0 | 6.25E-05 | 3 | 1.62E-02 |
| CSMD1    | 4 | 10 | 1 | 1 | 0 | 0 | 5.12E-05 | 7 | 1.80E-02 |
| TRPM1    | 1 | 5  | 1 | 1 | 0 | 0 | 2.80E-05 | 6 | 1.81E-02 |
| TMEM132E | 1 | 3  | 0 | 0 | 1 | 0 | 1.81E-05 | 3 | 2.04E-02 |
| NF1      | 0 | 4  | 1 | 1 | 2 | 0 | 1.80E-05 | 5 | 2.08E-02 |
| KLHL25   | 0 | 4  | 0 | 0 | 0 | 0 | 1.62E-05 | 3 | 2.10E-02 |
| MARK3    | 0 | 1  | 1 | 0 | 0 | 0 | 2.12E-04 | 2 | 2.10E-02 |
| OVGP1    | 0 | 0  | 0 | 0 | 0 | 3 | 1.23E-05 | 1 | 2.22E-02 |
| KCNS2    | 0 | 3  | 1 | 0 | 0 | 0 | 1.51E-04 | 4 | 2.48E-02 |
| PPP3R2   | 1 | 1  | 1 | 0 | 0 | 0 | 5.63E-04 | 2 | 2.48E-02 |
| RBMX     | 0 | 2  | 0 | 0 | 0 | 0 | 2.71E-04 | 1 | 2.50E-02 |
| BNC2     | 0 | 1  | 0 | 1 | 0 | 0 | 2.20E-04 | 2 | 2.59E-02 |
| KCNK2    | 1 | 2  | 1 | 0 | 0 | 0 | 6.27E-05 | 3 | 2.66E-02 |

|          |   |    |   |   |   |   |          |   |          |
|----------|---|----|---|---|---|---|----------|---|----------|
| GCN1L1   | 0 | 1  | 0 | 1 | 2 | 0 | 1.69E-05 | 3 | 2.67E-02 |
| ACTN2    | 2 | 5  | 1 | 0 | 0 | 0 | 1.20E-04 | 4 | 2.70E-02 |
| DYDC2    | 0 | 2  | 1 | 0 | 0 | 0 | 1.08E-04 | 3 | 2.98E-02 |
| BANP     | 0 | 1  | 1 | 0 | 0 | 0 | 1.44E-04 | 2 | 3.00E-02 |
| SEMA3A   | 1 | 3  | 1 | 1 | 0 | 0 | 8.95E-05 | 4 | 3.07E-02 |
| ADAMTS5  | 1 | 7  | 1 | 1 | 0 | 0 | 7.64E-05 | 6 | 3.59E-02 |
| PTPRG    | 0 | 1  | 0 | 0 | 1 | 0 | 3.81E-06 | 2 | 3.70E-02 |
| INHBA    | 0 | 4  | 0 | 0 | 0 | 0 | 7.11E-05 | 3 | 3.74E-02 |
| PCDH17   | 3 | 13 | 0 | 0 | 0 | 0 | 2.27E-05 | 5 | 3.87E-02 |
| PCDH11X  | 2 | 13 | 1 | 0 | 0 | 0 | 4.79E-05 | 4 | 3.87E-02 |
| BCLAF1   | 1 | 3  | 0 | 1 | 0 | 0 | 6.67E-05 | 3 | 3.96E-02 |
| ATN1     | 2 | 0  | 0 | 0 | 0 | 2 | 4.85E-06 | 1 | 3.98E-02 |
| EMR2     | 0 | 2  | 0 | 0 | 1 | 0 | 7.73E-06 | 3 | 4.02E-02 |
| UNC5B    | 1 | 3  | 0 | 1 | 1 | 1 | 4.50E-05 | 5 | 4.02E-02 |
| OGT      | 0 | 1  | 1 | 0 | 0 | 0 | 2.95E-04 | 2 | 4.03E-02 |
| MYL10    | 0 | 2  | 1 | 0 | 0 | 0 | 1.96E-04 | 2 | 4.19E-02 |
| COL6A6   | 0 | 4  | 0 | 2 | 2 | 0 | 2.08E-05 | 4 | 4.34E-02 |
| TIFAB    | 0 | 4  | 0 | 0 | 0 | 0 | 6.29E-04 | 2 | 4.35E-02 |
| DCAF4L2  | 2 | 6  | 0 | 0 | 0 | 0 | 7.52E-05 | 3 | 4.41E-02 |
| DCAF8L1  | 0 | 9  | 0 | 0 | 0 | 0 | 6.71E-05 | 3 | 4.61E-02 |
| ARHGAP27 | 0 | 1  | 1 | 2 | 0 | 0 | 9.91E-05 | 4 | 4.64E-02 |
| PREPL    | 0 | 3  | 0 | 0 | 0 | 0 | 9.72E-05 | 2 | 4.65E-02 |
| CDC42BPA | 0 | 1  | 1 | 2 | 0 | 0 | 5.08E-05 | 3 | 4.68E-02 |
| PAPPA2   | 5 | 12 | 0 | 0 | 0 | 0 | 2.22E-05 | 3 | 4.98E-02 |
| ZC3H12C  | 1 | 1  | 1 | 0 | 0 | 0 | 7.86E-05 | 2 | 4.99E-02 |

**Note: #\_pa is the number of positive alpha.**

**Table S8** Driver genes in LUSC

| gene     | silent | missense | nonsense | splicing | Fs_indel | nFs_indel | avg_alpha | #_pa | p_adj    |
|----------|--------|----------|----------|----------|----------|-----------|-----------|------|----------|
| ACTRT1   | 1      | 6        | 0        | 0        | 0        | 0         | 1.63E-04  | 4    | 2.48E-02 |
| ADAM18   | 0      | 6        | 0        | 4        | 0        | 0         | 7.03E-05  | 5    | 3.57E-02 |
| ADAMTS12 | 7      | 15       | 0        | 1        | 2        | 0         | 3.55E-05  | 8    | 1.67E-04 |
| ADCY8    | 1      | 10       | 1        | 1        | 0        | 0         | 5.71E-05  | 6    | 4.58E-02 |
| AGAP3    | 1      | 3        | 0        | 1        | 0        | 0         | 7.78E-05  | 2    | 3.81E-02 |
| AGAP6    | 0      | 6        | 0        | 0        | 0        | 0         | 1.46E-05  | 3    | 1.20E-02 |
| ANKRD30A | 2      | 8        | 3        | 2        | 1        | 0         | 3.58E-05  | 8    | 4.26E-04 |
| ANO5     | 2      | 10       | 1        | 0        | 0        | 0         | 3.31E-04  | 4    | 3.09E-03 |
| ARID1A   | 1      | 4        | 1        | 1        | 2        | 0         | 2.29E-05  | 5    | 4.27E-02 |
| ARSD     | 1      | 3        | 0        | 0        | 0        | 1         | 1.31E-05  | 3    | 1.23E-02 |
| ASB17    | 1      | 5        | 0        | 0        | 0        | 0         | 3.73E-05  | 3    | 1.23E-02 |
| ASB5     | 0      | 6        | 0        | 1        | 0        | 0         | 1.10E-04  | 6    | 6.30E-03 |
| ATP10B   | 4      | 12       | 1        | 0        | 0        | 0         | 2.39E-05  | 7    | 3.55E-02 |
| BMP5     | 1      | 3        | 2        | 0        | 0        | 0         | 6.99E-04  | 5    | 9.37E-03 |
| C1orf173 | 6      | 18       | 1        | 0        | 1        | 0         | 1.09E-05  | 8    | 1.06E-05 |
| C1QB     | 1      | 4        | 0        | 0        | 1        | 0         | 3.13E-05  | 2    | 4.34E-03 |
| C6       | 2      | 9        | 3        | 1        | 0        | 0         | 5.49E-05  | 7    | 2.11E-03 |
| C8orf22  | 0      | 3        | 1        | 0        | 0        | 0         | 2.62E-03  | 3    | 1.46E-02 |
| CALN1    | 0      | 6        | 1        | 0        | 0        | 0         | 9.81E-05  | 4    | 7.09E-04 |
| CCDC158  | 0      | 3        | 1        | 2        | 0        | 0         | 7.35E-05  | 3    | 4.94E-03 |
| CCT8L2   | 1      | 8        | 0        | 0        | 1        | 0         | 1.71E-05  | 5    | 4.11E-02 |
| CDH10    | 4      | 15       | 3        | 5        | 0        | 0         | 2.23E-04  | 12   | 2.65E-18 |
| CDH18    | 1      | 12       | 0        | 1        | 0        | 0         | 5.22E-05  | 7    | 1.64E-04 |
| CDKN2A   | 0      | 6        | 2        | 2        | 1        | 0         | 3.68E-04  | 9    | 1.01E-10 |
| CLEC4C   | 0      | 2        | 1        | 0        | 0        | 0         | 1.91E-03  | 2    | 1.25E-02 |
| CLRN2    | 1      | 5        | 0        | 0        | 0        | 0         | 9.85E-05  | 3    | 3.92E-02 |
| CLSTN2   | 2      | 4        | 2        | 1        | 0        | 0         | 5.85E-05  | 6    | 9.65E-04 |
| CNGB3    | 2      | 11       | 1        | 0        | 1        | 0         | 4.48E-05  | 7    | 1.47E-05 |
| CNTN5    | 0      | 8        | 0        | 1        | 1        | 0         | 3.17E-04  | 7    | 3.06E-03 |
| CNTNAP5  | 7      | 12       | 1        | 0        | 1        | 0         | 4.41E-05  | 9    | 2.56E-04 |
| COL11A1  | 2      | 19       | 1        | 1        | 3        | 0         | 9.35E-05  | 6    | 1.24E-05 |
| COL22A1  | 2      | 13       | 1        | 3        | 1        | 0         | 1.68E-05  | 9    | 7.95E-04 |
| CPS1     | 2      | 14       | 0        | 2        | 0        | 0         | 5.21E-05  | 6    | 2.03E-04 |
| CR2      | 1      | 2        | 1        | 0        | 2        | 0         | 1.61E-05  | 4    | 2.62E-02 |
| CRB1     | 1      | 19       | 0        | 0        | 0        | 0         | 6.61E-05  | 5    | 4.25E-06 |
| CREBBP   | 0      | 10       | 1        | 0        | 1        | 0         | 1.66E-05  | 6    | 1.09E-03 |
| CRISP1   | 1      | 2        | 1        | 1        | 0        | 0         | 2.34E-04  | 4    | 1.63E-02 |
| CSMD2    | 2      | 18       | 4        | 1        | 1        | 0         | 7.84E-05  | 11   | 5.16E-04 |
| CSMD3    | 15     | 44       | 7        | 0        | 4        | 0         | 4.14E-05  | 12   | 1.04E-18 |
| CTBS     | 0      | 1        | 0        | 0        | 0        | 2         | 1.40E-05  | 2    | 6.14E-03 |
| CXorf59  | 0      | 4        | 0        | 2        | 0        | 0         | 1.83E-04  | 5    | 1.47E-02 |



|          |   |    |   |   |   |   |          |    |          |
|----------|---|----|---|---|---|---|----------|----|----------|
| DAND5    | 0 | 2  | 1 | 0 | 0 | 0 | 7.23E-04 | 3  | 1.19E-02 |
| DCAF12L1 | 1 | 12 | 2 | 0 | 1 | 0 | 1.37E-04 | 8  | 7.46E-08 |
| DCAF4L2  | 3 | 8  | 0 | 0 | 0 | 0 | 6.68E-05 | 5  | 7.53E-03 |
| DCAF8L2  | 2 | 6  | 0 | 0 | 0 | 0 | 3.01E-05 | 5  | 1.57E-02 |
| DCP1B    | 0 | 5  | 0 | 0 | 0 | 1 | 3.50E-05 | 5  | 4.02E-02 |
| DENND2A  | 0 | 4  | 0 | 0 | 1 | 0 | 3.38E-05 | 4  | 1.31E-02 |
| DGKK     | 2 | 4  | 0 | 3 | 0 | 0 | 6.79E-05 | 5  | 4.25E-02 |
| DLGAP2   | 0 | 4  | 0 | 0 | 2 | 0 | 1.32E-05 | 4  | 1.05E-02 |
| DOLK     | 1 | 1  | 0 | 0 | 1 | 0 | 4.97E-05 | 2  | 3.80E-02 |
| DPP10    | 2 | 9  | 1 | 2 | 0 | 0 | 3.90E-05 | 6  | 1.29E-02 |
| DUSP27   | 4 | 10 | 0 | 0 | 0 | 0 | 2.68E-05 | 5  | 2.26E-02 |
| ENPEP    | 0 | 6  | 1 | 0 | 1 | 0 | 2.03E-05 | 5  | 3.18E-02 |
| EPHA3    | 3 | 6  | 3 | 1 | 1 | 0 | 7.92E-05 | 8  | 4.96E-06 |
| EXO1     | 1 | 2  | 1 | 3 | 0 | 1 | 5.92E-05 | 7  | 2.13E-02 |
| FAM114A1 | 0 | 2  | 0 | 2 | 0 | 0 | 1.33E-04 | 4  | 4.12E-02 |
| FAM135B  | 7 | 18 | 0 | 0 | 1 | 0 | 1.67E-05 | 8  | 3.61E-04 |
| FAM47A   | 3 | 6  | 1 | 0 | 2 | 0 | 3.34E-05 | 6  | 4.66E-04 |
| FAM47C   | 2 | 10 | 2 | 0 | 0 | 0 | 3.06E-05 | 8  | 1.23E-02 |
| FAM50A   | 0 | 1  | 0 | 2 | 0 | 0 | 1.37E-04 | 3  | 1.60E-02 |
| FAM5C    | 2 | 14 | 1 | 0 | 0 | 0 | 4.25E-05 | 7  | 1.11E-06 |
| FAT1     | 3 | 8  | 4 | 1 | 0 | 0 | 2.84E-05 | 6  | 1.41E-02 |
| FBXW7    | 1 | 5  | 2 | 0 | 0 | 0 | 1.82E-04 | 5  | 1.51E-04 |
| FLRT2    | 3 | 9  | 0 | 0 | 0 | 0 | 7.20E-05 | 5  | 3.82E-02 |
| FMN2     | 4 | 11 | 0 | 0 | 0 | 2 | 1.05E-05 | 7  | 1.18E-02 |
| GABRA6   | 0 | 2  | 1 | 0 | 2 | 0 | 3.28E-04 | 4  | 1.79E-02 |
| GIMAP8   | 1 | 4  | 0 | 1 | 0 | 0 | 1.46E-04 | 4  | 3.59E-02 |
| GLT1D1   | 1 | 2  | 2 | 0 | 0 | 0 | 1.61E-04 | 3  | 3.88E-02 |
| GPR17    | 1 | 3  | 0 | 0 | 0 | 0 | 1.16E-04 | 2  | 4.58E-02 |
| GRIA4    | 0 | 7  | 1 | 0 | 0 | 0 | 1.13E-04 | 6  | 2.01E-02 |
| GRM1     | 2 | 5  | 3 | 1 | 0 | 0 | 2.67E-04 | 7  | 6.15E-04 |
| GUCY1A2  | 2 | 4  | 0 | 1 | 1 | 0 | 8.89E-05 | 4  | 1.18E-02 |
| GYPE     | 0 | 1  | 0 | 2 | 0 | 0 | 1.44E-03 | 2  | 2.69E-03 |
| HAVCR1   | 3 | 1  | 0 | 0 | 1 | 0 | 1.21E-05 | 2  | 3.05E-02 |
| HBD      | 0 | 4  | 0 | 0 | 0 | 0 | 1.03E-03 | 3  | 1.91E-02 |
| HCN1     | 8 | 11 | 3 | 1 | 1 | 0 | 1.32E-04 | 11 | 1.12E-06 |
| HEATR7B2 | 5 | 12 | 3 | 0 | 2 | 0 | 1.78E-04 | 7  | 6.75E-04 |
| HLA-A    | 0 | 9  | 2 | 0 | 0 | 0 | 2.00E-04 | 7  | 7.76E-10 |
| HLA-DRB5 | 1 | 3  | 4 | 0 | 0 | 0 | 3.44E-03 | 3  | 4.00E-09 |
| HLTF     | 1 | 5  | 1 | 1 | 0 | 0 | 5.39E-05 | 4  | 3.89E-02 |
| HNRNPH3  | 0 | 0  | 0 | 2 | 0 | 0 | 3.84E-04 | 1  | 2.71E-02 |
| HRC      | 0 | 0  | 0 | 1 | 0 | 2 | 1.77E-04 | 2  | 1.51E-02 |
| HSPD1    | 1 | 1  | 0 | 3 | 0 | 0 | 2.88E-04 | 2  | 2.37E-04 |
| IGSF1    | 0 | 4  | 1 | 1 | 1 | 0 | 3.97E-05 | 4  | 4.98E-02 |
| IGSF3    | 0 | 0  | 0 | 0 | 0 | 2 | 4.19E-06 | 1  | 2.69E-02 |

|           |    |    |   |   |   |    |          |    |          |
|-----------|----|----|---|---|---|----|----------|----|----------|
| IL1RAPL1  | 3  | 6  | 2 | 0 | 0 | 0  | 1.75E-04 | 6  | 2.30E-02 |
| IMPG1     | 1  | 8  | 0 | 0 | 1 | 0  | 3.66E-05 | 6  | 4.66E-03 |
| ITGA8     | 1  | 9  | 0 | 3 | 0 | 0  | 3.47E-05 | 7  | 2.16E-03 |
| ITGAD     | 0  | 6  | 2 | 1 | 0 | 0  | 4.82E-05 | 8  | 2.36E-02 |
| KCND2     | 1  | 7  | 0 | 0 | 0 | 0  | 2.14E-05 | 5  | 3.28E-02 |
| KCNIP4    | 1  | 4  | 1 | 1 | 0 | 0  | 4.08E-04 | 5  | 3.76E-04 |
| KCNJ12    | 10 | 9  | 0 | 0 | 0 | 0  | 9.40E-05 | 4  | 2.31E-06 |
| KCNT2     | 2  | 2  | 0 | 1 | 2 | 0  | 4.65E-05 | 4  | 2.71E-02 |
| KDM6A     | 0  | 2  | 2 | 4 | 0 | 0  | 5.96E-04 | 6  | 1.07E-04 |
| KDR       | 3  | 4  | 1 | 1 | 0 | 0  | 1.20E-03 | 4  | 1.20E-02 |
| KEAP1     | 0  | 15 | 0 | 0 | 2 | 0  | 7.31E-05 | 7  | 4.09E-11 |
| KIAA2022  | 1  | 11 | 1 | 0 | 0 | 0  | 2.40E-05 | 4  | 3.08E-03 |
| KIF16B    | 1  | 5  | 0 | 0 | 2 | 0  | 2.34E-05 | 6  | 6.55E-03 |
| KIF2B     | 4  | 9  | 0 | 0 | 1 | 0  | 1.57E-05 | 5  | 4.80E-02 |
| KLHL1     | 2  | 9  | 1 | 0 | 0 | 0  | 1.09E-04 | 6  | 5.89E-04 |
| KLHL4     | 0  | 6  | 1 | 1 | 0 | 0  | 5.87E-05 | 5  | 4.54E-02 |
| KLK15     | 0  | 1  | 0 | 1 | 1 | 0  | 2.16E-04 | 3  | 4.13E-02 |
| KRTAP21-1 | 0  | 4  | 0 | 0 | 0 | 0  | 1.18E-04 | 3  | 3.41E-02 |
| KRTAP4-5  | 0  | 0  | 0 | 0 | 0 | 2  | 2.81E-05 | 1  | 4.33E-03 |
| KRTAP5-1  | 0  | 0  | 0 | 0 | 0 | 10 | 9.18E-05 | 1  | 8.38E-21 |
| KRTAP5-5  | 0  | 2  | 0 | 0 | 0 | 9  | 4.88E-05 | 3  | 5.89E-18 |
| KRTAP5-8  | 0  | 1  | 0 | 0 | 0 | 2  | 2.78E-05 | 2  | 2.65E-02 |
| LILRA2    | 4  | 4  | 0 | 1 | 1 | 0  | 8.09E-04 | 5  | 4.60E-04 |
| LPHN3     | 3  | 11 | 0 | 1 | 0 | 0  | 2.95E-05 | 6  | 4.24E-02 |
| LPPR4     | 1  | 4  | 1 | 1 | 0 | 0  | 6.61E-04 | 4  | 8.03E-03 |
| LRFN5     | 3  | 11 | 2 | 0 | 0 | 0  | 7.16E-05 | 5  | 7.89E-07 |
| LRP1B     | 5  | 41 | 2 | 0 | 2 | 0  | 1.36E-05 | 9  | 1.42E-08 |
| LRP2      | 7  | 17 | 1 | 1 | 0 | 0  | 4.49E-05 | 9  | 1.71E-02 |
| LRRC7     | 5  | 10 | 0 | 1 | 0 | 0  | 4.59E-05 | 7  | 3.28E-02 |
| LRRTM1    | 5  | 4  | 0 | 0 | 3 | 0  | 1.45E-05 | 5  | 7.07E-04 |
| MAGEB6    | 3  | 8  | 1 | 0 | 0 | 0  | 7.54E-05 | 7  | 3.08E-02 |
| MAGEC1    | 1  | 11 | 0 | 0 | 2 | 1  | 1.12E-05 | 5  | 7.69E-06 |
| MAGEE2    | 0  | 3  | 1 | 0 | 1 | 0  | 5.46E-05 | 3  | 2.36E-02 |
| MARCO     | 1  | 4  | 0 | 3 | 0 | 0  | 1.35E-04 | 5  | 4.95E-05 |
| MCCC1     | 0  | 1  | 0 | 3 | 0 | 0  | 2.26E-04 | 2  | 3.20E-02 |
| MCF2      | 2  | 4  | 0 | 2 | 2 | 0  | 3.95E-05 | 4  | 7.57E-03 |
| MCHR2     | 1  | 4  | 1 | 1 | 1 | 0  | 2.35E-04 | 5  | 3.09E-04 |
| MLL2      | 3  | 9  | 4 | 6 | 6 | 1  | 3.16E-05 | 11 | 1.55E-08 |
| MMP16     | 2  | 6  | 2 | 0 | 0 | 0  | 7.17E-05 | 6  | 6.85E-05 |
| MS4A14    | 1  | 7  | 0 | 0 | 1 | 0  | 1.46E-05 | 5  | 1.31E-02 |
| MSLNL     | 2  | 1  | 1 | 0 | 1 | 0  | 6.44E-04 | 3  | 4.06E-02 |
| MTNR1B    | 0  | 4  | 1 | 0 | 0 | 0  | 8.82E-05 | 4  | 3.55E-02 |
| MUC16     | 29 | 73 | 4 | 2 | 1 | 0  | 1.32E-05 | 9  | 1.16E-05 |
| MUC17     | 9  | 17 | 1 | 1 | 0 | 0  | 9.94E-05 | 7  | 1.16E-02 |

|          |    |    |   |   |   |   |          |    |          |
|----------|----|----|---|---|---|---|----------|----|----------|
| MUC6     | 4  | 13 | 0 | 0 | 0 | 0 | 6.84E-06 | 7  | 2.24E-02 |
| MYH1     | 4  | 16 | 0 | 0 | 0 | 0 | 1.88E-05 | 6  | 1.76E-02 |
| MYH13    | 1  | 13 | 0 | 0 | 0 | 0 | 1.52E-05 | 6  | 2.63E-02 |
| MYH2     | 3  | 16 | 1 | 0 | 0 | 0 | 3.76E-05 | 7  | 4.18E-05 |
| MYH8     | 1  | 12 | 0 | 0 | 0 | 0 | 3.07E-05 | 4  | 2.15E-03 |
| NAALAD2  | 2  | 4  | 1 | 1 | 0 | 0 | 5.17E-05 | 4  | 3.15E-02 |
| NAV3     | 4  | 17 | 2 | 1 | 0 | 0 | 2.62E-05 | 11 | 8.59E-04 |
| NEFH     | 2  | 2  | 0 | 0 | 0 | 3 | 7.43E-06 | 1  | 3.25E-02 |
| NF1      | 1  | 9  | 2 | 2 | 0 | 0 | 2.20E-05 | 7  | 4.55E-02 |
| NFE2L2   | 0  | 11 | 0 | 0 | 0 | 1 | 6.92E-05 | 8  | 1.21E-06 |
| NLGN4X   | 3  | 9  | 0 | 0 | 1 | 0 | 3.58E-05 | 5  | 1.86E-03 |
| NLRP3    | 5  | 10 | 3 | 0 | 0 | 0 | 6.45E-05 | 7  | 4.91E-05 |
| NRK      | 3  | 7  | 0 | 1 | 0 | 0 | 3.03E-05 | 3  | 3.16E-02 |
| NTM      | 4  | 3  | 2 | 0 | 0 | 0 | 1.26E-04 | 4  | 4.67E-03 |
| NUP205   | 0  | 5  | 2 | 0 | 0 | 0 | 1.12E-04 | 5  | 3.63E-02 |
| NUPL2    | 0  | 1  | 0 | 0 | 0 | 2 | 1.30E-05 | 2  | 4.58E-02 |
| OLFM4    | 1  | 5  | 0 | 1 | 0 | 0 | 2.34E-04 | 4  | 1.70E-02 |
| OPN1SW   | 2  | 3  | 0 | 1 | 0 | 0 | 2.01E-04 | 3  | 1.05E-02 |
| OVGP1    | 0  | 3  | 1 | 0 | 0 | 3 | 2.95E-05 | 5  | 3.54E-04 |
| PABPC1   | 3  | 8  | 0 | 0 | 0 | 0 | 2.91E-05 | 5  | 4.62E-03 |
| PABPC3   | 8  | 7  | 3 | 0 | 0 | 0 | 4.69E-04 | 5  | 3.35E-05 |
| PANK3    | 0  | 5  | 0 | 0 | 0 | 0 | 4.98E-05 | 2  | 1.33E-02 |
| PAPPA2   | 7  | 26 | 1 | 0 | 0 | 0 | 1.71E-05 | 8  | 5.15E-06 |
| PCDH11X  | 3  | 17 | 1 | 0 | 0 | 0 | 2.56E-04 | 6  | 1.68E-07 |
| PCLO     | 15 | 20 | 0 | 3 | 0 | 0 | 6.70E-04 | 6  | 3.58E-04 |
| PEG3     | 1  | 9  | 3 | 0 | 1 | 0 | 1.86E-05 | 8  | 9.36E-03 |
| PIK3CA   | 0  | 10 | 0 | 0 | 0 | 0 | 2.87E-05 | 3  | 2.78E-05 |
| PIK3CG   | 0  | 11 | 1 | 1 | 0 | 0 | 6.13E-05 | 8  | 5.83E-05 |
| PKHD1    | 5  | 15 | 2 | 1 | 0 | 0 | 1.97E-05 | 6  | 1.81E-03 |
| PKHD1L1  | 5  | 22 | 0 | 0 | 2 | 0 | 4.38E-06 | 5  | 2.98E-02 |
| PLD5     | 2  | 7  | 0 | 1 | 0 | 0 | 9.41E-05 | 6  | 1.25E-03 |
| PLXNA4   | 3  | 9  | 2 | 1 | 1 | 0 | 9.36E-05 | 8  | 9.78E-03 |
| PNLIPRP3 | 1  | 6  | 0 | 1 | 0 | 0 | 7.07E-05 | 4  | 2.26E-02 |
| POTEA    | 1  | 6  | 0 | 1 | 0 | 0 | 5.41E-05 | 4  | 4.65E-03 |
| POTEC    | 2  | 7  | 0 | 1 | 1 | 0 | 5.31E-05 | 7  | 2.88E-02 |
| POU6F2   | 1  | 3  | 0 | 2 | 0 | 0 | 1.06E-04 | 3  | 4.77E-02 |
| PRAME    | 2  | 5  | 1 | 0 | 0 | 0 | 4.32E-04 | 5  | 2.77E-02 |
| PRDM9    | 4  | 11 | 3 | 1 | 0 | 0 | 1.00E-04 | 8  | 5.11E-06 |
| PRG4     | 9  | 3  | 0 | 0 | 0 | 4 | 3.25E-06 | 3  | 7.46E-05 |
| PRIM2    | 1  | 4  | 1 | 1 | 0 | 0 | 7.15E-05 | 4  | 1.64E-02 |
| PTEN     | 0  | 3  | 3 | 1 | 1 | 0 | 1.82E-04 | 8  | 2.82E-05 |
| PTPN11   | 0  | 1  | 3 | 0 | 0 | 0 | 5.80E-04 | 2  | 2.98E-05 |
| PYHIN1   | 1  | 5  | 0 | 0 | 0 | 0 | 2.56E-04 | 2  | 3.57E-02 |
| RAG2     | 0  | 6  | 0 | 0 | 0 | 0 | 3.88E-05 | 2  | 4.28E-02 |

|           |    |    |   |   |   |   |          |    |          |
|-----------|----|----|---|---|---|---|----------|----|----------|
| RALY      | 0  | 1  | 0 | 0 | 0 | 2 | 7.05E-05 | 2  | 7.82E-04 |
| RANBP17   | 1  | 2  | 1 | 1 | 1 | 0 | 5.39E-05 | 5  | 1.86E-02 |
| RASA1     | 0  | 0  | 2 | 3 | 0 | 1 | 1.08E-04 | 6  | 7.09E-04 |
| RASSF9    | 0  | 5  | 1 | 0 | 0 | 0 | 5.05E-05 | 4  | 1.42E-02 |
| RB1       | 0  | 2  | 3 | 2 | 1 | 0 | 1.42E-04 | 7  | 7.68E-05 |
| REG1A     | 0  | 4  | 0 | 1 | 1 | 0 | 1.77E-04 | 5  | 4.67E-03 |
| REG1B     | 0  | 4  | 0 | 2 | 0 | 0 | 4.12E-04 | 2  | 2.51E-04 |
| REG3A     | 0  | 6  | 0 | 0 | 0 | 0 | 1.15E-04 | 2  | 4.94E-04 |
| RELN      | 10 | 18 | 3 | 4 | 0 | 0 | 3.31E-05 | 11 | 1.79E-03 |
| RIMS2     | 3  | 10 | 0 | 0 | 0 | 0 | 3.23E-05 | 5  | 1.12E-02 |
| RPL10L    | 1  | 7  | 0 | 0 | 0 | 0 | 1.42E-04 | 5  | 1.74E-02 |
| RXFP1     | 0  | 7  | 0 | 0 | 0 | 0 | 3.37E-05 | 2  | 1.85E-02 |
| RXRG      | 1  | 3  | 2 | 0 | 0 | 0 | 4.81E-04 | 5  | 9.38E-03 |
| RYR2      | 9  | 55 | 2 | 2 | 2 | 0 | 2.42E-05 | 11 | 1.64E-14 |
| SALL1     | 3  | 13 | 1 | 0 | 2 | 1 | 1.97E-05 | 9  | 3.91E-03 |
| SCN1A     | 3  | 18 | 1 | 1 | 0 | 0 | 2.57E-05 | 6  | 4.85E-05 |
| SCN2A     | 2  | 7  | 0 | 2 | 1 | 0 | 2.85E-05 | 6  | 2.36E-02 |
| SEMA3E    | 2  | 3  | 1 | 2 | 0 | 0 | 7.89E-05 | 5  | 1.19E-02 |
| SEMG2     | 0  | 2  | 2 | 0 | 1 | 0 | 1.61E-04 | 4  | 2.25E-02 |
| SEPT14    | 1  | 2  | 1 | 2 | 0 | 0 | 1.59E-04 | 5  | 1.84E-02 |
| SERPINB12 | 1  | 3  | 1 | 1 | 0 | 0 | 9.43E-04 | 5  | 3.17E-02 |
| SI        | 3  | 14 | 1 | 1 | 0 | 0 | 3.56E-05 | 7  | 2.10E-03 |
| SKA3      | 0  | 1  | 0 | 4 | 0 | 0 | 2.48E-04 | 4  | 7.21E-04 |
| SLC17A6   | 1  | 5  | 2 | 0 | 0 | 0 | 7.27E-05 | 5  | 1.51E-03 |
| SLC25A10  | 1  | 5  | 0 | 0 | 1 | 0 | 3.86E-05 | 5  | 2.68E-03 |
| SLC26A7   | 1  | 4  | 2 | 0 | 0 | 0 | 5.20E-05 | 6  | 1.20E-02 |
| SLC6A11   | 1  | 1  | 0 | 2 | 0 | 1 | 1.22E-04 | 2  | 7.37E-03 |
| SLC8A1    | 3  | 6  | 2 | 0 | 0 | 0 | 1.48E-04 | 7  | 3.09E-02 |
| SLCO1B1   | 2  | 5  | 2 | 0 | 0 | 0 | 1.34E-04 | 6  | 3.84E-02 |
| SLCO1C1   | 1  | 10 | 0 | 2 | 0 | 0 | 2.02E-04 | 7  | 1.35E-05 |
| SLIT2     | 4  | 9  | 2 | 1 | 0 | 0 | 4.74E-05 | 8  | 3.52E-02 |
| SLITRK2   | 2  | 7  | 0 | 0 | 1 | 0 | 7.24E-05 | 6  | 1.78E-02 |
| SLITRK3   | 6  | 8  | 0 | 0 | 1 | 0 | 6.56E-05 | 6  | 2.81E-02 |
| SLITRK4   | 0  | 3  | 3 | 0 | 0 | 0 | 9.88E-05 | 3  | 2.81E-02 |
| SORCS1    | 3  | 9  | 1 | 1 | 0 | 0 | 1.32E-04 | 7  | 8.20E-03 |
| SPANXN1   | 0  | 1  | 1 | 2 | 0 | 0 | 1.08E-03 | 4  | 1.05E-02 |
| SPHKAP    | 3  | 20 | 1 | 0 | 0 | 0 | 2.47E-05 | 7  | 5.44E-03 |
| SPRYD5    | 2  | 5  | 0 | 1 | 0 | 0 | 2.10E-04 | 5  | 2.25E-02 |
| SPTA1     | 9  | 20 | 1 | 0 | 1 | 0 | 1.17E-05 | 10 | 7.55E-03 |
| SRPK1     | 0  | 2  | 0 | 0 | 2 | 0 | 6.55E-05 | 3  | 2.76E-02 |
| SYMPK     | 1  | 1  | 0 | 4 | 0 | 0 | 5.10E-04 | 4  | 3.24E-02 |
| SYNE2     | 5  | 7  | 2 | 1 | 0 | 0 | 2.41E-05 | 3  | 4.56E-02 |
| TDRD5     | 1  | 7  | 1 | 0 | 1 | 0 | 3.62E-05 | 6  | 9.37E-03 |
| TECRL     | 2  | 5  | 0 | 0 | 0 | 0 | 4.03E-05 | 3  | 4.60E-02 |

|          |    |    |    |   |    |   |          |    |          |
|----------|----|----|----|---|----|---|----------|----|----------|
| TFAP2D   | 2  | 7  | 1  | 0 | 0  | 0 | 1.21E-04 | 5  | 7.49E-03 |
| THEMIS   | 0  | 8  | 0  | 1 | 0  | 0 | 7.62E-05 | 5  | 9.73E-03 |
| THSD7B   | 2  | 10 | 0  | 0 | 1  | 0 | 8.16E-06 | 4  | 3.80E-02 |
| TLR4     | 2  | 5  | 1  | 0 | 1  | 0 | 1.74E-05 | 6  | 6.59E-03 |
| TMEM132D | 2  | 14 | 0  | 0 | 0  | 0 | 4.28E-05 | 5  | 1.41E-03 |
| TMEM35   | 1  | 4  | 0  | 0 | 0  | 0 | 6.61E-05 | 3  | 2.94E-02 |
| TNKS1BP1 | 1  | 3  | 0  | 0 | 3  | 0 | 2.76E-06 | 4  | 2.83E-02 |
| TNN      | 4  | 15 | 0  | 0 | 2  | 0 | 2.60E-05 | 8  | 1.52E-04 |
| TNR      | 5  | 12 | 0  | 2 | 1  | 0 | 3.28E-05 | 9  | 4.91E-05 |
| TP53     | 1  | 63 | 12 | 6 | 11 | 3 | 1.32E-03 | 18 | 1.8E-151 |
| TRIM42   | 0  | 7  | 2  | 0 | 0  | 0 | 5.77E-05 | 5  | 9.11E-03 |
| TRIM58   | 3  | 10 | 1  | 1 | 0  | 0 | 1.18E-04 | 6  | 1.27E-05 |
| TRPS1    | 0  | 9  | 1  | 0 | 0  | 1 | 1.18E-05 | 7  | 5.02E-03 |
| TRPV5    | 1  | 4  | 0  | 1 | 1  | 0 | 5.69E-05 | 5  | 1.17E-02 |
| UGT3A1   | 0  | 7  | 0  | 0 | 0  | 0 | 8.26E-05 | 5  | 3.84E-02 |
| UNC5D    | 5  | 7  | 0  | 0 | 0  | 0 | 3.08E-05 | 4  | 2.71E-02 |
| USH1C    | 0  | 6  | 0  | 0 | 1  | 0 | 3.75E-05 | 4  | 3.54E-02 |
| USH2A    | 12 | 38 | 3  | 3 | 0  | 0 | 2.15E-05 | 9  | 8.84E-08 |
| USP29    | 1  | 7  | 1  | 0 | 0  | 0 | 2.75E-05 | 3  | 2.96E-02 |
| VAMP3    | 1  | 2  | 1  | 0 | 0  | 0 | 6.84E-04 | 3  | 9.70E-03 |
| VEGFC    | 0  | 7  | 0  | 0 | 0  | 0 | 5.09E-05 | 5  | 2.50E-03 |
| VGLL1    | 0  | 4  | 0  | 1 | 0  | 0 | 3.73E-04 | 3  | 1.74E-02 |
| VMO1     | 0  | 0  | 0  | 6 | 0  | 0 | 3.29E-03 | 1  | 2.02E-09 |
| VN1R5    | 0  | 3  | 2  | 0 | 0  | 0 | 1.19E-04 | 3  | 1.46E-03 |
| VWA3B    | 3  | 8  | 0  | 1 | 0  | 0 | 8.03E-05 | 4  | 1.73E-02 |
| WDR72    | 0  | 6  | 1  | 0 | 1  | 0 | 1.29E-05 | 6  | 2.95E-02 |
| XIRP2    | 14 | 33 | 2  | 0 | 0  | 0 | 9.77E-06 | 7  | 7.85E-04 |
| ZC4H2    | 1  | 6  | 0  | 0 | 0  | 0 | 2.81E-04 | 2  | 3.19E-02 |
| ZCCHC12  | 1  | 4  | 0  | 0 | 1  | 0 | 5.75E-05 | 4  | 2.44E-02 |
| ZFHX4    | 4  | 38 | 4  | 0 | 2  | 0 | 3.43E-05 | 11 | 1.41E-12 |
| ZFP42    | 0  | 3  | 0  | 0 | 1  | 0 | 2.41E-05 | 3  | 2.75E-02 |
| ZNF208   | 4  | 10 | 2  | 0 | 0  | 0 | 3.54E-05 | 6  | 3.23E-02 |
| ZNF479   | 3  | 5  | 5  | 0 | 0  | 0 | 2.07E-03 | 4  | 9.14E-08 |
| ZNF516   | 0  | 4  | 0  | 0 | 3  | 0 | 1.31E-05 | 4  | 3.17E-02 |
| ZNF536   | 7  | 14 | 0  | 0 | 1  | 0 | 1.11E-05 | 7  | 9.04E-04 |
| ZNF645   | 1  | 4  | 0  | 0 | 1  | 0 | 4.98E-05 | 5  | 3.95E-02 |
| ZNF679   | 0  | 4  | 0  | 2 | 0  | 0 | 2.20E-04 | 6  | 2.85E-02 |
| ZNF716   | 1  | 6  | 0  | 0 | 0  | 0 | 4.83E-05 | 2  | 1.33E-02 |
| ZNF787   | 0  | 0  | 1  | 1 | 1  | 0 | 3.50E-04 | 3  | 4.98E-02 |
| ZNF804A  | 2  | 11 | 2  | 0 | 1  | 0 | 2.53E-05 | 6  | 2.76E-05 |
| ZNF804B  | 8  | 12 | 3  | 0 | 0  | 0 | 3.03E-04 | 7  | 3.41E-05 |
| ZNF835   | 1  | 5  | 0  | 0 | 0  | 0 | 3.80E-05 | 2  | 1.84E-02 |
| ZNF99    | 3  | 4  | 2  | 1 | 1  | 0 | 7.72E-05 | 6  | 2.16E-03 |

**Table S9** Driver pathways in LUAD

| pathway_id | pathway_name                                | silent | missense | nonsense | splicing | Fs_indel | nFs_indel | p_adj   |
|------------|---------------------------------------------|--------|----------|----------|----------|----------|-----------|---------|
| hsa04510   | Focal adhesion                              | 95     | 251      | 21       | 31       | 7        | 2         | 7.9E-33 |
| hsa04010   | MAPK signaling pathway                      | 60     | 184      | 15       | 18       | 7        | 1         | 3.8E-27 |
| hsa04020   | Calcium signaling pathway                   | 87     | 236      | 18       | 12       | 8        | 2         | 4.7E-22 |
| hsa04512   | ECM-receptor interaction                    | 61     | 155      | 14       | 20       | 5        | 0         | 1.8E-18 |
| hsa04514   | Cell adhesion molecules (CAMs)              | 44     | 137      | 8        | 5        | 4        | 0         | 6.0E-18 |
| hsa04530   | Tight junction                              | 37     | 122      | 8        | 7        | 3        | 2         | 9.1E-17 |
| hsa04210   | Apoptosis                                   | 15     | 48       | 10       | 6        | 4        | 0         | 1.2E-16 |
| hsa04540   | Gap junction                                | 35     | 91       | 13       | 8        | 2        | 1         | 1.9E-16 |
| hsa04810   | Regulation of actin cytoskeleton            | 51     | 159      | 17       | 12       | 4        | 1         | 2.2E-15 |
| hsa04110   | Cell cycle                                  | 15     | 70       | 11       | 9        | 5        | 1         | 2.2E-15 |
| hsa04144   | Endocytosis                                 | 35     | 125      | 2        | 16       | 2        | 1         | 1.9E-14 |
| hsa04310   | Wnt signaling pathway                       | 20     | 92       | 14       | 9        | 5        | 0         | 4.0E-14 |
| hsa04060   | Cytokine-cytokine receptor interaction      | 44     | 107      | 12       | 9        | 1        | 1         | 5.0E-13 |
| hsa04012   | ErbB signaling pathway                      | 24     | 73       | 1        | 5        | 0        | 2         | 2.8E-12 |
| hsa04115   | p53 signaling pathway                       | 9      | 47       | 6        | 4        | 4        | 0         | 1.4E-11 |
| hsa04145   | Phagosome                                   | 30     | 66       | 10       | 3        | 4        | 0         | 1.9E-11 |
| hsa04520   | Adherens junction                           | 12     | 53       | 11       | 5        | 2        | 2         | 4.6E-11 |
| hsa04370   | VEGF signaling pathway                      | 16     | 67       | 3        | 6        | 1        | 0         | 6.6E-09 |
| hsa04120   | Ubiquitin mediated proteolysis              | 21     | 95       | 10       | 4        | 1        | 1         | 9.7E-08 |
| u0002      | HMTs histone methylation reader             | 23     | 60       | 5        | 5        | 5        | 0         | 2.6E-07 |
| u0001      | Ch remodeling gene                          | 18     | 51       | 8        | 4        | 1        | 2         | 1.4E-06 |
| hsa04350   | TGF-beta signaling pathway                  | 18     | 42       | 4        | 2        | 0        | 0         | 5.1E-06 |
| hsa02010   | ABC transporters                            | 23     | 59       | 6        | 7        | 3        | 0         | 6.7E-06 |
| hsa04150   | mTOR signaling pathway                      | 11     | 28       | 4        | 2        | 1        | 0         | 8.4E-06 |
| hsa04114   | Oocyte meiosis                              | 27     | 46       | 8        | 7        | 3        | 0         | 1.1E-05 |
| hsa04142   | Lysosome                                    | 12     | 34       | 2        | 3        | 3        | 3         | 2.2E-05 |
| hsa04630   | Jak-STAT signaling pathway                  | 30     | 63       | 7        | 3        | 2        | 0         | 3.1E-05 |
| hsa03018   | RNA degradation                             | 7      | 36       | 1        | 2        | 1        | 0         | 6.1E-05 |
| u0004      | DNMTs and Methyl-CpG binding                | 1      | 12       | 2        | 1        | 0        | 0         | 2.1E-04 |
| hsa04141   | Protein processing in endoplasmic reticulum | 26     | 59       | 7        | 3        | 2        | 1         | 3.0E-04 |
| hsa04070   | Phosphatidylinositol signaling system       | 21     | 68       | 4        | 5        | 2        | 0         | 3.4E-04 |
| hsa04146   | Peroxisome                                  | 7      | 26       | 1        | 1        | 1        | 0         | 1.3E-03 |
| u0003      | HATs HDACs                                  | 9      | 16       | 3        | 4        | 1        | 1         | 1.8E-03 |

**Table S10** Driver pathways in LUSC

| pathway_id | pathway_name                                | silent | missense | nonsense | splicing | Fs_indel | nFs_indel | p_adj   |
|------------|---------------------------------------------|--------|----------|----------|----------|----------|-----------|---------|
| hsa04350   | TGF-beta signaling pathway                  | 15     | 116      | 20       | 16       | 15       | 3         | 6.4E-60 |
| hsa04141   | Protein processing in endoplasmic reticulum | 169    | 400      | 36       | 17       | 15       | 1         | 2.3E-58 |
| hsa04070   | Phosphatidylinositol signaling system       | 52     | 218      | 23       | 15       | 19       | 3         | 2.3E-54 |
| hsa04340   | Hedgehog signaling pathway                  | 27     | 142      | 17       | 11       | 12       | 3         | 6.0E-50 |
| hsa04060   | Cytokine-cytokine receptor interaction      | 121    | 329      | 28       | 33       | 22       | 6         | 3.5E-48 |
| hsa04122   | Sulfur relay system                         | 144    | 397      | 28       | 27       | 18       | 1         | 3.1E-43 |
| hsa04145   | Phagosome                                   | 94     | 217      | 18       | 8        | 6        | 0         | 8.1E-32 |
| hsa04144   | Endocytosis                                 | 100    | 282      | 19       | 25       | 14       | 1         | 4.8E-25 |
| hsa04150   | mTOR signaling pathway                      | 77     | 174      | 17       | 12       | 6        | 0         | 7.8E-24 |
| hsa04630   | Jak-STAT signaling pathway                  | 56     | 151      | 9        | 6        | 9        | 0         | 4.0E-22 |
| hsa04310   | Wnt signaling pathway                       | 92     | 271      | 15       | 17       | 11       | 1         | 1.5E-20 |
| hsa04510   | Focal adhesion                              | 63     | 150      | 12       | 13       | 6        | 0         | 9.8E-20 |
| hsa04120   | Ubiquitin mediated proteolysis              | 58     | 149      | 11       | 12       | 8        | 0         | 7.8E-18 |
| hsa04146   | Peroxisome                                  | 67     | 206      | 21       | 9        | 6        | 0         | 1.4E-17 |
| u0002      | HMTs histone methylation reader             | 37     | 132      | 20       | 16       | 9        | 1         | 2.8E-17 |
| hsa04114   | Oocyte meiosis                              | 29     | 79       | 14       | 5        | 6        | 0         | 1.5E-16 |
| hsa04142   | Lysosome                                    | 78     | 177      | 15       | 17       | 10       | 0         | 7.9E-15 |
| hsa03410   | Base excision repair                        | 25     | 69       | 5        | 6        | 4        | 2         | 2.4E-13 |
| hsa04130   | SNARE interactions in vesicular transport   | 39     | 141      | 14       | 10       | 7        | 0         | 1.4E-12 |
| hsa04370   | VEGF signaling pathway                      | 46     | 108      | 9        | 9        | 8        | 0         | 1.9E-12 |
| hsa04115   | p53 signaling pathway                       | 36     | 84       | 6        | 7        | 3        | 2         | 2.2E-12 |
| hsa04512   | ECM-receptor interaction                    | 39     | 90       | 7        | 10       | 4        | 0         | 4.1E-12 |
| hsa03050   | Proteasome                                  | 59     | 153      | 14       | 8        | 6        | 0         | 1.5E-10 |
| hsa03030   | DNA replication                             | 39     | 136      | 8        | 5        | 3        | 1         | 4.3E-10 |
| hsa04140   | Regulation of autophagy                     | 17     | 60       | 5        | 5        | 2        | 0         | 2.9E-09 |
| hsa04520   | Adherens junction                           | 28     | 83       | 3        | 4        | 3        | 1         | 1.2E-08 |
| hsa03018   | RNA degradation                             | 32     | 87       | 12       | 5        | 4        | 0         | 1.3E-08 |
| u0003      | HATs HDACs                                  | 14     | 45       | 3        | 5        | 3        | 0         | 1.7E-08 |
| u0001      | Ch remodeling gene                          | 52     | 104      | 11       | 17       | 7        | 0         | 7.4E-08 |
| hsa04514   | Cell adhesion molecules (CAMs)              | 47     | 110      | 12       | 6        | 5        | 0         | 8.4E-08 |

|          |                                         |    |     |   |    |   |   |         |
|----------|-----------------------------------------|----|-----|---|----|---|---|---------|
| hsa04020 | Calcium signaling pathway               | 48 | 121 | 7 | 11 | 5 | 0 | 5.6E-06 |
| hsa04080 | Neuroactive ligand-receptor interaction | 15 | 51  | 2 | 8  | 3 | 2 | 9.1E-06 |
| hsa03020 | RNA polymerase                          | 24 | 64  | 8 | 3  | 4 | 0 | 1.7E-05 |
| hsa04330 | Notch signaling pathway                 | 47 | 105 | 8 | 9  | 4 | 0 | 3.6E-05 |
| hsa04530 | Tight junction                          | 22 | 51  | 5 | 3  | 0 | 0 | 6.4E-05 |
| hsa04810 | Regulation of actin cytoskeleton        | 18 | 42  | 3 | 2  | 0 | 0 | 1.5E-04 |
| hsa04210 | Apoptosis                               | 35 | 78  | 5 | 9  | 3 | 2 | 5.4E-04 |
| hsa04012 | ErbB signaling pathway                  | 15 | 61  | 8 | 1  | 0 | 1 | 1.7E-03 |
| hsa04110 | Cell cycle                              | 22 | 54  | 5 | 4  | 0 | 0 | 9.6E-03 |

---



**Table S11** Driver genes in non-hypermethylated CRC

| gene      | silent | missense | nonsense | splicing | Fs_indel | nFs_indel | avg_alpha | #_pa | p_adj    |
|-----------|--------|----------|----------|----------|----------|-----------|-----------|------|----------|
| APC       | 1      | 10       | 139      | 9        | 42       | 0         | 2.40E-03  | 13   | 0        |
| TP53      | 1      | 78       | 20       | 3        | 15       | 1         | 1.46E-03  | 17   | 6.1E-208 |
| KRAS      | 0      | 85       | 0        | 0        | 0        | 0         | 4.92E-04  | 5    | 1.2E-200 |
| PIK3CA    | 0      | 29       | 0        | 0        | 0        | 0         | 4.01E-05  | 7    | 1.43E-25 |
| NRAS      | 0      | 18       | 0        | 0        | 0        | 0         | 9.94E-05  | 5    | 1.30E-24 |
| FBXW7     | 1      | 22       | 1        | 1        | 0        | 1         | 2.08E-04  | 9    | 1.53E-23 |
| SMAD4     | 0      | 17       | 1        | 1        | 0        | 1         | 1.61E-04  | 9    | 3.62E-17 |
| AMER1     | 0      | 1        | 12       | 0        | 2        | 0         | 7.58E-04  | 4    | 6.07E-16 |
| SOX9      | 0      | 0        | 3        | 0        | 6        | 0         | 1.50E-04  | 2    | 7.15E-11 |
| SMAD2     | 0      | 6        | 4        | 1        | 0        | 0         | 4.69E-04  | 8    | 6.89E-10 |
| LRP1B     | 5      | 21       | 4        | 2        | 0        | 0         | 5.48E-05  | 9    | 9.18E-10 |
| TCF7L2    | 0      | 6        | 5        | 1        | 1        | 0         | 2.91E-04  | 8    | 3.19E-08 |
| BRAF      | 0      | 7        | 0        | 0        | 0        | 0         | 4.06E-05  | 1    | 3.91E-06 |
| CTNNB1    | 0      | 10       | 0        | 0        | 0        | 0         | 5.55E-05  | 5    | 1.48E-05 |
| ACVR1B    | 0      | 8        | 2        | 0        | 0        | 0         | 1.07E-04  | 4    | 2.12E-05 |
| TNFRSF10C | 0      | 6        | 0        | 0        | 0        | 0         | 1.09E-04  | 1    | 1.03E-04 |
| ELF3      | 0      | 1        | 1        | 0        | 3        | 0         | 2.23E-04  | 2    | 2.58E-04 |
| NUTM2F    | 0      | 5        | 0        | 0        | 1        | 0         | 1.32E-05  | 3    | 2.73E-04 |
| ARID1A    | 1      | 4        | 6        | 0        | 1        | 0         | 2.00E-04  | 6    | 2.87E-04 |
| GRIK3     | 2      | 13       | 1        | 1        | 0        | 0         | 1.66E-04  | 5    | 2.91E-04 |
| EIF4A2    | 0      | 4        | 0        | 0        | 0        | 1         | 1.27E-04  | 4    | 3.50E-04 |
| LIFR      | 1      | 9        | 2        | 0        | 0        | 0         | 5.94E-05  | 7    | 3.77E-04 |
| PCDH9     | 4      | 14       | 0        | 0        | 0        | 0         | 2.22E-05  | 7    | 3.91E-04 |
| ERBB4     | 3      | 8        | 0        | 1        | 0        | 0         | 2.23E-05  | 6    | 4.95E-04 |
| PCBP1     | 0      | 5        | 0        | 0        | 0        | 0         | 3.53E-05  | 2    | 5.16E-04 |
| KRTAP5-5  | 1      | 3        | 0        | 0        | 0        | 0         | 1.40E-03  | 1    | 8.49E-04 |
| TTN       | 13     | 64       | 7        | 1        | 1        | 0         | 1.47E-05  | 8    | 1.80E-03 |
| FAT4      | 6      | 21       | 0        | 0        | 1        | 0         | 5.74E-06  | 8    | 1.96E-03 |
| DMD       | 4      | 11       | 2        | 1        | 0        | 0         | 8.27E-05  | 6    | 2.41E-03 |
| IL1RAPL2  | 3      | 4        | 2        | 0        | 0        | 0         | 2.07E-03  | 2    | 2.64E-03 |
| ADAM29    | 1      | 9        | 0        | 0        | 0        | 0         | 1.83E-04  | 3    | 4.38E-03 |
| SLITRK1   | 3      | 8        | 0        | 0        | 1        | 0         | 9.72E-05  | 4    | 4.43E-03 |
| CNTN6     | 1      | 8        | 0        | 0        | 0        | 0         | 1.21E-04  | 3    | 0.01     |
| GPC6      | 0      | 6        | 0        | 1        | 0        | 0         | 9.97E-05  | 4    | 0.01     |
| ATM       | 0      | 6        | 3        | 1        | 1        | 1         | 3.46E-05  | 10   | 0.02     |
| TGIF1     | 0      | 1        | 1        | 0        | 2        | 0         | 7.06E-05  | 3    | 0.02     |
| RBM10     | 0      | 0        | 4        | 0        | 1        | 0         | 5.84E-04  | 3    | 0.02     |
| WBSCR17   | 2      | 7        | 1        | 0        | 0        | 0         | 1.26E-04  | 3    | 0.02     |
| OPCML     | 2      | 5        | 1        | 0        | 0        | 0         | 2.15E-04  | 3    | 0.03     |
| TENM1     | 3      | 12       | 1        | 1        | 0        | 0         | 5.46E-05  | 3    | 0.03     |
| PCDHB13   | 1      | 5        | 0        | 0        | 0        | 0         | 1.00E-05  | 6    | 0.03     |
| TLL1      | 1      | 9        | 0        | 1        | 0        | 0         | 5.62E-05  | 7    | 0.03     |
| KLHL4     | 1      | 8        | 0        | 0        | 0        | 0         | 1.30E-04  | 4    | 0.03     |
| CASP14    | 0      | 5        | 1        | 0        | 0        | 0         | 1.18E-03  | 2    | 0.05     |

**Table S12** Driver genes in HGS-OvCa

| gene     | silent | missense | nonsense | splicing | Fs_indel | nFs_indel | mean_alpha | #_pa | p_adj    |
|----------|--------|----------|----------|----------|----------|-----------|------------|------|----------|
| TP53     | 0      | 187      | 29       | 34       | 43       | 11        | 7.55E-04   | 22   | 0        |
| BRCA1    | 0      | 1        | 4        | 0        | 6        | 0         | 1.46E-04   | 6    | 3.91E-09 |
| NF1      | 0      | 5        | 3        | 1        | 4        | 0         | 4.25E-05   | 8    | 4.07E-06 |
| CSMD3    | 3      | 18       | 1        | 0        | 0        | 0         | 7.02E-06   | 9    | 1.74E-04 |
| CDK12    | 0      | 4        | 2        | 0        | 2        | 1         | 1.79E-05   | 6    | 9.53E-04 |
| RB1      | 0      | 1        | 2        | 1        | 2        | 0         | 1.21E-04   | 4    | 1.22E-03 |
| BRCA2    | 0      | 3        | 2        | 0        | 5        | 0         | 1.10E-05   | 4    | 2.05E-03 |
| USH2A    | 3      | 17       | 2        | 1        | 0        | 0         | 2.18E-05   | 8    | 7.81E-03 |
| HIST1H1C | 0      | 3        | 1        | 0        | 0        | 0         | 5.41E-04   | 3    | 0.01     |
| SI       | 0      | 8        | 0        | 1        | 0        | 0         | 9.37E-06   | 6    | 0.02     |
| SNTG1    | 1      | 2        | 3        | 0        | 0        | 0         | 3.43E-05   | 5    | 0.02     |
| NLRP3    | 0      | 4        | 0        | 1        | 0        | 0         | 2.93E-05   | 4    | 0.02     |
| CREBBP   | 1      | 3        | 1        | 1        | 2        | 0         | 4.31E-05   | 5    | 0.02     |
| ZNF706   | 0      | 1        | 1        | 0        | 0        | 0         | 1.05E-03   | 2    | 0.02     |
| TMEM132D | 3      | 5        | 2        | 0        | 0        | 0         | 3.15E-05   | 7    | 0.02     |
| RB1CC1   | 1      | 2        | 3        | 0        | 0        | 2         | 9.82E-06   | 4    | 0.02     |
| MYH4     | 1      | 8        | 0        | 1        | 0        | 0         | 1.07E-05   | 6    | 0.03     |
| TSPYL1   | 0      | 0        | 2        | 0        | 0        | 1         | 1.21E-04   | 3    | 0.03     |
| BAI3     | 0      | 8        | 0        | 1        | 0        | 0         | 8.36E-06   | 5    | 0.03     |
| TMPRSS3  | 1      | 1        | 0        | 2        | 0        | 0         | 8.69E-05   | 2    | 0.03     |
| LRRC7    | 1      | 7        | 0        | 0        | 0        | 0         | 1.22E-05   | 5    | 0.04     |
| DUSP19   | 0      | 4        | 0        | 0        | 0        | 0         | 2.58E-05   | 2    | 0.04     |
| GNAS     | 0      | 1        | 2        | 0        | 0        | 0         | 1.26E-03   | 1    | 0.04     |
| C1orf95  | 0      | 2        | 1        | 0        | 0        | 0         | 3.65E-04   | 3    | 0.04     |
| CDC27    | 0      | 2        | 0        | 1        | 1        | 0         | 1.69E-05   | 3    | 0.04     |
| GPR149   | 1      | 5        | 0        | 1        | 0        | 0         | 3.20E-04   | 5    | 0.04     |
| KIAA1462 | 1      | 2        | 1        | 0        | 2        | 0         | 3.68E-05   | 4    | 0.04     |
| SLCO1C1  | 0      | 6        | 0        | 0        | 0        | 0         | 6.37E-06   | 4    | 0.05     |
| EFEMP1   | 0      | 3        | 0        | 1        | 1        | 0         | 3.29E-05   | 5    | 0.05     |
